# Supplementary material for: Biases and gaps in freshwater mollusc research in Latin America and the Caribbean: A multi-decadal bibliometric analysis (1976–2024)
Source: Research Square preprint supplement (doi:10.21203/rs.3.rs-8875581/v1), 2026-02-17
Supplement: Supplementary file 1 [file 6739713eb9fa99a6f27ea540.xlsx]

## Sheet: COVER
Biases and gaps in freshwater mollusc research in Latin America and the Caribbean: A multi-decadal bibliometric analysis (1976–2024) Nicolás Reyes-Quinteros1*; Rebeca Carballo2* Corresponding author: quinteroryesnicolas@gmail.com; bekicarballo@gmail.com 1. Laboratorio de Ecofisiología Vegetal y Microalgas, Facultad de Ciencias, Universidad del Bío-Bío, Chillán, Chile. 2. Laboratorio de Malacologí…
Supplementary Material S1. Detailed metadata of Web of Science publications on freshwater gastropods and bivalves in Latin America and the Caribbean
Supplementary Material S2. Distribution of freshwater mollusk studies by country and thematic category in Latin America and the Caribbean.
Supplementary Material S3. Taxonomic composition and frequency of freshwater mollusk species reported in the bibliometric dataset from Latin America and the Caribbean.
Supplementary Material S4. Pivot-table summary of the freshwater mollusk species list (S3), showing taxonomic hierarchy (class, order, family, and species) and counts in Latin America and the Caribbean
Supplementary Material S5. List of freshwater mollusk species and their IUCN Red List conservation status in Latin America and the Caribbean.
Supplementary Material S6. Network metrics of the author collaboration network in freshwater mollusk research based on Web of Science records.
Supplementary Material S7. Most productive authors in freshwater mollusk research and gender distribution of authorship in Latin America and the Caribbean.

## Sheet: S1
Supplementary Material S1. Detailed metadata of Web of Science publications on freshwater gastropods and bivalves in Latin America and the Caribbean
Authors	Author Full Names	Article Title	Source Title	Journal Abbreviation	AQUATIC SYSTEM	DOI	DOI Link	SPECIES	BIVALVE OR GASTROPOD	COUNTRY	CATEGORY	YEAR OF PUBLICATION
Pessotto, MA; Nogueira, MG	Pessotto, M. A.; Nogueira, M. G.	More than two decades after the introduction of Limnoperna fortunei (Dunker 1857) in La Plata Basin	BRAZILIAN JOURNAL OF BIOLOGY	BRAZ J BIOL	Lotic	10.1590/1519-6984.180789	http://dx.doi.org/10.1590/1519-6984.180789	Limnoperna fortunei	Bivalve	Brasil; Argentina; Bolivia; Paraguay; Uruguay	Conservation	2018
Abad, TN; de Almeida, HK; Minaberry, YS; Yusseppone, MS; Calcagno, JA; Sabatini, SE	Abad, Tatiana Noya; de Almeida, Henrique Knack; Minaberry, Yanina Susana; Yusseppone, Maria Soledad; Calcagno, Javier Angel; Sabatini, Sebastian Eduardo	Effects of metals exposure on morphological and histological structure of the digestive gland in native and invasive clams in the Paraná de las Palmas River (Buenos Aires, Argentina)	AQUATIC SCIENCES	AQUAT SCI	Lotic	10.1007/s00027-024-01087-6	http://dx.doi.org/10.1007/s00027-024-01087-6	Corbicula fluminea; Diplodon delodontus	Bivalve; Bivalve	Argentina	Physiology	2024
Damborenea, C; Labaut, Y; Penchaszadeh, P; Collado, GA; Darrigran, G	Damborenea, Cristina; Labaut, Yeny; Penchaszadeh, Pablo; Collado, Gonzalo A.; Darrigran, Gustavo	Gonadal Cycle of Corbicula largillierti (Bivalvia: Cyrenidae) in a Pampean Streams, Argentina	DIVERSITY-BASEL	DIVERSITY-BASEL	Lotic	10.3390/d16060357	http://dx.doi.org/10.3390/d16060357	Corbicula largillierti	Bivalve	Argentina	Morphology	2024
Torres, SH; de Lucía, M; Gregoric, DEG; Darrigran, G	Torres, Santiago Hernan; de Lucia, Micaela; Gregoric, Diego Eduardo Gutierrez; Darrigran, Gustavo	Freshwater mussel conservation in southern South America: update on distribution range and current threats	AQUATIC SCIENCES	AQUAT SCI	Both	10.1007/s00027-024-01059-w	http://dx.doi.org/10.1007/s00027-024-01059-w	Castalia ambigua; Castalia inflata; Castalia psammotica; Diplodon chilensis; Diplodon delodontus; Diplodon parallelopipedon; Diplodon parodizi; Diplodon rhuacoicus; Diplodon rotundus; Diplodon wymaunii; Rhipidodonta burroughiana; Rhipidodonta charruana; Rhipidodonta hylaea; Rhipidodonta paranensis; Rhipidodonta variabilis; Anodontites elongata; Anodontites ferrarisi; Anodontites laevigatus; Anodo…	Bivalve; Bivalve; Bivalve; Bivalve; Bivalve; Bivalve; Bivalve; Bivalve; Bivalve; Bivalve; Bivalve; Bivalve; Bivalve; Bivalve; Bivalve; Bivalve; Bivalve; Bivalve; Bivalve; Bivalve; Bivalve; Bivalve; Bivalve; Bivalve; Bivalve; Bivalve; Bivalve; Bivalve; Bivalve; Bivalve; Bivalve; Bivalve; Bivalve; Bivalve	Argentina	Conservation; Ecology	2024
Bianco, KA; Bernal-Rey, DL; Menendez-Helman, RJ; Kristoff, G	Bianco, Karina A.; Bernal-Rey, Daissy L.; Menendez-Helman, Renata J.; Kristoff, Gisela	Lethality and Acetylcholinesterase Inhibition in a Native Invertebrate Species Exposed to Water Samples of an Impacted Stream (Reconquista River Basin, Argentina)	BULLETIN OF ENVIRONMENTAL CONTAMINATION AND TOXICOLOGY	B ENVIRON CONTAM TOX	Lotic	10.1007/s00128-023-03742-4	http://dx.doi.org/10.1007/s00128-023-03742-4	Biomphalaria straminea	Gastropod	Argentina	Physiology	2023
de Lucía, M; Darrigran, G; Gregoric, DEG	de Lucia, Micaela; Darrigran, Gustavo; Gutierrez Gregoric, Diego E.	The most problematic freshwater invasive species in South America, Limnoperna fortunei (Dunker, 1857), and its status after 30 years of invasion	AQUATIC SCIENCES	AQUAT SCI	Lotic	10.1007/s00027-022-00907-x	http://dx.doi.org/10.1007/s00027-022-00907-x	Limnoperna fortunei	Bivalve	Argentina	Conservation	2023
Trovant, B; Signorelli, JH; Battini, N	Trovant, B.; Signorelli, J. H.; Battini, N.	Invasive pest spreads beyond the last frontier: Corbicula clam in the Chubut River, Patagonia	LIMNOLOGY	LIMNOLOGY	Lotic	10.1007/s10201-022-00708-z	http://dx.doi.org/10.1007/s10201-022-00708-z	Corbicula spp.	Bivalve	Argentina	Conservation	2023
Paredes, MG; Bianco, KA; Menendez-Helman, RJ; Kristoff, G	Paredes, Maria Gimena; Bianco, Karina Alesia; Menendez-Helman, Renata J.; Kristoff, Gisela	Aquatic Contamination in Lugano Lake (Lugano Lake Ecological Reserve, Buenos Aires, Argentina) Cause Negative Effects on the Reproduction and Juvenile Survival of the Native Gastropod Biomphalaria straminea	FRONTIERS IN PHYSIOLOGY	FRONT PHYSIOL	Lentic	10.3389/fphys.2022.954868	http://dx.doi.org/10.3389/fphys.2022.954868	Biomphalaria straminea	Gastropod	Argentina	Physiology	2022
Labaut, Y; Macchi, PA; Archuby, FM; Darrigran, G	Labaut, Yeny; Macchi, Pablo A.; Archuby, Fernando M.; Darrigran, Gustavo	Homogenization of Macroinvertebrate Assemblages and Asiatic Clam Corbicula fluminea Invasion in a River of the Arid Patagonian Plateau, Argentina	FRONTIERS IN ENVIRONMENTAL SCIENCE	FRONT ENV SCI-SWITZ	Lotic	10.3389/fenvs.2021.728620	http://dx.doi.org/10.3389/fenvs.2021.728620	Biomphalaria peregrina; Anisancylus obliquus; Physa cubensis; Heleobia parchappii; Heleobia hatcheri; Lymnea sp.; Chilina gibbosa; Pisidium sterkianum; Diplodon chilensis	Gastropod; Gastropod; Gastropod; Gastropod; Gastropod; Gastropod; Gastropod; Bivalve; Bivalve	Argentina	Conservation	2021
Tomassi, CA; Vogler, RE; Beltramino, AA; Salas, LB; Cuezzo, MG	Tomassi, Carla Antonella; Vogler, Roberto Eugenio; Beltramino, Ariel Anibal; Salas, Liliana Beatriz; Cuezzo, Maria Gabriela	A new species of Succinea (Gastropoda: Stylommatophora) from the Puna highlands of Argentina	ZOOLOGISCHER ANZEIGER	ZOOL ANZ	Lentic	10.1016/j.jcz.2021.09.005	http://dx.doi.org/10.1016/j.jcz.2021.09.005	Succinea puna	Gastropod	Argentina	Taxonomy, Morphology	2021
de Lucía, M; Gonçalves, ICB; dos Santos, SB; Collado, GA; Gregoric, DEG	de Lucia, Micaela; Goncalves, Isabela Cristina B.; dos Santos, Sonia Barbosa; Collado, Gonzalo A.; Gregoric, Diego E. Gutierrez	Phylogenetic and morphological study of the genus Potamolithus (Truncatelloidea: Tateidae) in hotspots of diversity at the Paranaense Forest, Argentina, with the addition of six new species	ZOOLOGISCHER ANZEIGER	ZOOL ANZ	Lotic	10.1016/j.jcz.2021.03.003	http://dx.doi.org/10.1016/j.jcz.2021.03.003	Potamolithus rauli; Potamolithus tricarinatus; Potamolithus recurvatus; Potamolithus grossus; Potamolithus nelidae; Potamolithus nezibrus	Gastropod; Gastropod; Gastropod; Gastropod; Gastropod; Gastropod	Argentina	Genetics; Taxonomy; Morphology	2021
Parietti, M; Merlo, MJ; Etchegoin, JA	Parietti, Manuela; Merlo, Matias Javier; Etchegoin, Jorge Alejandro	Effects of droughts on the larval digenean assemblage that parasitizes the snail Biomphalaria peregrina (Planorbidae): a 4-year study in a temporary pond from Argentina	PARASITOLOGY RESEARCH	PARASITOL RES	-	10.1007/s00436-021-07110-1	http://dx.doi.org/10.1007/s00436-021-07110-1	Biomphalaria peregrina	Gastropod	Argentina	Parasitology	2021
Rodriguez, FA; Reyna, PB; Maggioni, T; Giménez, DR; Torre, L	Rodriguez, Florencia A.; Reyna, Paola B.; Maggioni, Tamara; Gimenez, Diego R.; Torre, Luciana	The role of temperature and oxygen availability on the distribution of Corbicula largillierti	INVERTEBRATE BIOLOGY	INVERTEBR BIOL	-	10.1111/ivb.12305	http://dx.doi.org/10.1111/ivb.12305	Corbicula largillierti	Bivalve	Argentina	Physiology	2020
Seuffert, ME; Martín, PR	Seuffert, M. E.; Martin, P. R.	Exceeding its own limits: range expansion in Argentina of the globally invasive apple snail Pomacea canaliculata	HYDROBIOLOGIA	HYDROBIOLOGIA	Both	10.1007/s10750-020-04447-z	http://dx.doi.org/10.1007/s10750-020-04447-z	Pomacea canaliculata	Gastropod	Argentina	Ecology	2020
Yusseppone, MS; Bianchi, VA; Castro, JM; Luquet, CM; Sabatini, SE; de Molina, MCR; Rocchetta, I	Yusseppone, Maria S.; Bianchi, Viginia A.; Castro, Juan M.; Luquet, Carlos M.; Sabatini, Sebastian E.; Rios de Molina, Maria C.; Rocchetta, Iara	Long- term effects of water quality on the freshwater bivalve Diplodon chilensis (Unionida: Hyriidae) caged at different sites in a North Patagonian river (Argentina)	ECOHYDROLOGY	ECOHYDROLOGY	Lotic	10.1002/eco.2181	http://dx.doi.org/10.1002/eco.2181	Diplodon chilensis	Bivalve	Argentina	Physiology	2020
Parietti, M; Merlo, MJ; Etchegoin, JA	Parietti, M.; Merlo, M. J.; Etchegoin, J. A.	Spatio-temporal variations in larval digenean assemblages of Heleobia parchappii (Mollusca: Cochliopidae) inhabiting four human-impacted streams	JOURNAL OF HELMINTHOLOGY	J HELMINTHOL	-	10.1017/S0022149X2000019X	http://dx.doi.org/10.1017/S0022149X2000019X	Heleobia parchappii	Gastropod	Argentina	Parasitology	2020
Reyna, PB; Ballesteros, ML; Albá, ML; Bertrand, L; González, M; Miglioranza, KSB; Tatián, M; Hued, AC	Reyna, P. B.; Ballesteros, M. L.; Alba, M. L.; Bertrand, L.; Gonzalez, M.; Miglioranza, K. S. B.; Tatian, M.; Hued, A. C.	A multilevel response approach reveals the Asian clam Corbicula largillierti as a mirror of aquatic pollution	SCIENCE OF THE TOTAL ENVIRONMENT	SCI TOTAL ENVIRON	Lotic	10.1016/j.scitotenv.2019.07.194	http://dx.doi.org/10.1016/j.scitotenv.2019.07.194	Corbicula largillierti	Bivalve	Argentina	Physiology	2019
Cristini, PA; De Francesco, CG	Andrea Cristini, Paula; German De Francesco, Claudio	Taphonomic field experiment in a freshwater shallow lake: alteration of gastropod shells below the sediment-water interface	JOURNAL OF MOLLUSCAN STUDIES	J MOLLUS STUD	Lentic	10.1093/mollus/eyz026	http://dx.doi.org/10.1093/mollus/eyz026	Heleobia parchappii; Biomphalaria peregrina; Pomacea canaliculata	Gastropod; Gastropod; Gastropod	Argentina	Palaeontology	2019
Maldonado, MA; Manara, E; Martín, PR	Maldonado, Mara A.; Manara, Enzo; Martin, Pablo R.	Antagonistic effects of a native apple snail on other snails and macroinvertebrates in Southern Pampas waterbodies: A mesocosm approach	LIMNOLOGICA	LIMNOLOGICA	Lotic	10.1016/j.limno.2019.125694	http://dx.doi.org/10.1016/j.limno.2019.125694	Pomacea canaliculata; Chilina parchappii; Heleobia parchappii; Biomphalaria peregrina; Melanoides tuberculata	Gastropod; Gastropod; Gastropod; Gastropod; Gastropod	Argentina	Ecology	2019
Fernández, MV; Hamann, MI	Fernandez, Maria V.; Hamann, Monika I.	Larval digenean communities in Biomphalaria species in two contrasting wetlands from South America	DISEASES OF AQUATIC ORGANISMS	DIS AQUAT ORGAN	-	10.3354/dao03256	http://dx.doi.org/10.3354/dao03256	Biomphalaria tenagophila; Biomphalaria occidentalis; Biomphalaria peregrina; Biomphalaria orbignyi; Biomphalaria straminea	Gastropod; Gastropod; Gastropod; Gastropod; Gastropod	Argentina	Parasitology	2018
Duchini, D; Boltovskoy, D; Sylvester, F	Duchini, Daniela; Boltovskoy, Demetrio; Sylvester, Francisco	The invasive freshwater bivalve Limnoperna fortunei in South America: multiannual changes in its predation and effects on associated benthic invertebrates	HYDROBIOLOGIA	HYDROBIOLOGIA	-	10.1007/s10750-018-3561-8	http://dx.doi.org/10.1007/s10750-018-3561-8	Limnoperna fortunei	Bivalve	Argentina	Conservation	2018
Gurovich, FM; Burela, S; Martín, PR	Gurovich, Fernanda M.; Burela, Silvana; Martin, Pablo R.	Life cycle of Pomacea americanista, a poorly known apple snail endemic to the Iguazu and Alto Parana Rivers, southern South America	JOURNAL OF MOLLUSCAN STUDIES	J MOLLUS STUD	Lotic	10.1093/mollus/eyx046	http://dx.doi.org/10.1093/mollus/eyx046	Pomacea americanista	Gastropod	Argentina	Ecology	2018
Cao, L; Damborenea, C; Penchaszadeh, PE; Darrigran, G	Cao, Luciana; Damborenea, Cristina; Penchaszadeh, Pablo E.; Darrigran, Gustavo	Gonadal cycle of Corbicula fluminea (Bivalvia: Corbiculidae) in Pampean streams (Southern Neotropical Region)	PLOS ONE	PLOS ONE	-	10.1371/journal.pone.0186850	http://dx.doi.org/10.1371/journal.pone.0186850	Corbicula fluminea	Bivalve	Argentina	Morphology	2017
Ferreira, AC; Paz, EL; Rumi, A; Ocon, C; Altieri, P; Captulo, AR	Clara Ferreira, Ana; Paz, Estefania L.; Rumi, Alejandra; Ocon, Carolina; Altieri, Paula; Rodrigues Captulo, Alberto	Ecology of the non-native snail Sinotaia cf quadrata (Caenogastropoda: Viviparidae). A study in a lowland stream of South America with different water qualities	ANAIS DA ACADEMIA BRASILEIRA DE CIENCIAS	AN ACAD BRAS CIENC	Lentic	10.1590/0001-3765201720160624	http://dx.doi.org/10.1590/0001-3765201720160624	Sinotaia cf quadrata	Gastropod	Argentina	Ecology	2017
Rumi, A; Vogler, RE; Beltramino, AA	Rumi, Alejandra; Eugenio Vogler, Roberto; Anibal Beltramino, Ariel	The South-American distribution and southernmost record of Biomphalaria peregrina-a potential intermediate host of schistosomiasis	PEERJ	PEERJ	-	10.7717/peerj.3401	http://dx.doi.org/10.7717/peerj.3401	Biomphalaria peregrina	Gastropod	Argentina	Ecology; Genetics	2017
Merlo, MJ; Parietti, M; Etchegoin, JA	Merlo, Matias J.; Parietti, Manuela; Etchegoin, Jorge A.	Stunting of the penis in Heleobia parchappii ( Mollusca: Cochliopidae) and its relationship with parasitism	DISEASES OF AQUATIC ORGANISMS	DIS AQUAT ORGAN	-	10.3354/dao03086	http://dx.doi.org/10.3354/dao03086	Heleobia parchappii	Gastropod	Argentina	Morphology; Parasitology	2017
Reshaid, Y; Cao, L; Brea, F; Blanche, MO; Torres, S; Darrigran, G	Reshaid, Yamila; Cao, Luciana; Brea, Francisco; Ortiz Blanche, Maria; Torres, Santiago; Darrigran, Gustavo	Variation in the distribution of Corbicula species (Mollusca: Bivalvia: Corbiculidae) after 25 years of its introduction in the Rio de la Plata, Argentina	ZOOLOGIA	ZOOLOGIA-CURITIBA	Lotic	10.3897/zoologia.34.e22181	http://dx.doi.org/10.3897/zoologia.34.e22181	Corbicula largillierti; Corbicula fluminea	Bivalve; Bivalve	Argentina	Conservation	2017
Martin, SM; Díaz, AC	Maris Martin, Stella; Diaz, Ana C.	Histology and gametogenesis in Heleobia piscium (Cochliopidae) from the Multiple Use Reserve Isla Martn Garca,'' Buenos Aires, Argentina	PEERJ	PEERJ	Lentic	10.7717/peerj.2548	http://dx.doi.org/10.7717/peerj.2548	Heleobia piscium	Gastropod	Argentina	Physiology	2016
Gregoric, DEG; de Lucía, M	Gutierrez Gregoric, Diego E.; de Lucia, Micaela	Freshwater gastropods diversity hotspots: three new species from the Uruguay River (South America)	PEERJ	PEERJ	Lotic	10.7717/peerj.2138	http://dx.doi.org/10.7717/peerj.2138	Chilina nicolasi; Chilina santiagoi; Chilina luciae	Gastropod; Gastropod; Gastropod	Argentina	Taxonomy	2016
Merlo, MJ; Parietti, M; Etchegoin, JA	Merlo, Matias J.; Parietti, Manuela; Etchegoin, Jorge A.	Long-term study of the life cycle of the freshwater snail Heleobia parchappii (Mollusca: Cochliopidae) in a lentic environment in Argentina	LIMNETICA	LIMNETICA	Lentic	10.23818/limn.35.04		Heleobia parchappii	Gastropod	Argentina	Parasitology	2016
Pisano, MF; Fucks, EE	Pisano, M. F.; Fucks, E. E.	Quaternary mollusc assemblages from the lower basin of Salado River, Buenos Aires Province: Their use as paleoenvironmental indicators	QUATERNARY INTERNATIONAL	QUATERN INT	Lotic	10.1016/j.quaint.2015.07.022	http://dx.doi.org/10.1016/j.quaint.2015.07.022	Heleobia parchappii; Antillorbis nordestensis; Biomphalaria peregrina; Drepanotrema heloicum; Uncancylus concentricus; Pomacea canaliculata; Succinea meridionalis; Miradiscops brasiliensis	Gastropod	Argentina	Paleontology	2016
Vogler, RE; Beltramino, AA; Strong, EE; Peso, JG; Rumi, A	Vogler, Roberto E.; Beltramino, Ariel A.; Strong, Ellen E.; Peso, Juana G.; Rumi, Alejandra	A phylogeographical perspective on the ex situ conservation of Aylacostoma (Thiaridae, Gastropoda) from the High Parana River (Argentina-Paraguay)	ZOOLOGICAL JOURNAL OF THE LINNEAN SOCIETY	ZOOL J LINN SOC-LOND	Lotic	10.1111/zoj.12250	http://dx.doi.org/10.1111/zoj.12250	Aylacostoma chloroticum; Aylacostoma brunneum	Gastropod	Argentina	Conservation	2015
Alda, P; Martorelli, SR	Alda, Pilar; Martorelli, Sergio R.	Larval trematodes infecting the South-American intertidal mud snail Heleobia australis (Rissooidea: Cochliopidae)	ACTA PARASITOLOGICA	ACTA PARASITOL		10.2478/s11686-014-0209-3	http://dx.doi.org/10.2478/s11686-014-0209-3	Heleobia australis	Gastropod	Argentina	Parasitology	2014
Bianchi, VA; Rocchetta, I; Luquet, CM	Bianchi, Virginia A.; Rocchetta, Iara; Luquet, Carlos M.	Biomarker responses to sewage pollution in freshwater mussels (Diplodon chilensis) transplanted to a Patagonian river	JOURNAL OF ENVIRONMENTAL SCIENCE AND HEALTH PART A-TOXIC/HAZARDOUS SUBSTANCES & ENVIRONMENTAL ENGINEERING	J ENVIRON SCI HEAL A		10.1080/10934529.2014.910065	http://dx.doi.org/10.1080/10934529.2014.910065	Diplodon chilensis	Bivalve	Argentina	Conservation	2014
Reyna, PB; Morán, AG; Tatián, M	Reyna, Paola B.; Moran, Ariana G.; Tatian, Marcos	Taxonomy, distribution and population structure of invasive Corbiculidae (Mollusca, Bivalvia) in the Suquia River basin, Cordoba, Argentina	IHERINGIA SERIE ZOOLOGIA	IHERINGIA SER ZOOL		10.1590/S0073-47212013000200001	http://dx.doi.org/10.1590/S0073-47212013000200001	Corbicula fluminea	Bivalve	Argentina	Taxonomy	2013
Carcedo, MC; Fiori, SM	Carcedo, M. C.; Fiori, S. M.	Long-term study of the life cycle and growth of Heleobia australis (Caenogastropoda, Cochliopidae) in the Bahia Blanca estuary, Argentina	CIENCIAS MARINAS	CIENC MAR		10.7773/cm.v38i4.2079	http://dx.doi.org/10.7773/cm.v38i4.2079	Heleobia australis	Gastropod	Argentina	Conservation	2012
Griffin, M; Varela, AN	Griffin, Miguel; Varela, Augusto N.	Systematic palaeontology and taphonomic significance of the mollusc fauna from the Mata Amarilla Formation (lower Upper Cretaceous), southern Patagonia, Argentina	CRETACEOUS RESEARCH	CRETACEOUS RES		10.1016/j.cretres.2012.03.016	http://dx.doi.org/10.1016/j.cretres.2012.03.016	Pterotrigonia flava	Bivalve	Argentina	Paleontology	2012
Burlakova, LE; Karatayev, AY; Karatayev, VA	Burlakova, Lyubov E.; Karatayev, Alexander Y.; Karatayev, Vadim A.	Invasive mussels induce community changes by increasing habitat complexity	HYDROBIOLOGIA	HYDROBIOLOGIA		10.1007/s10750-011-0791-4	http://dx.doi.org/10.1007/s10750-011-0791-4	Dreissena polymorpha; Limnoperna fortunei	Bivalve; Bivalve	Argentina	Conservation	2012
Cataldo, D; O' Farrell, I; Paolucci, E; Sylvester, F; Boltovskoy, D	Cataldo, Daniel; O' Farrell, Ines; Paolucci, Esteban; Sylvester, Francisco; Boltovskoy, Demetrio	Impact of the invasive golden mussel (Limnoperna fortunei) on phytoplankton and nutrient cycling	AQUATIC INVASIONS	AQUAT INVASIONS		10.3391/ai.2012.7.1.010	http://dx.doi.org/10.3391/ai.2012.7.1.010	Limnoperna fortunei	Bivalve	Argentina	Conservation	2012
Martín, SM; Díaz, AC	Martin, S. M.; Diaz, A. C.	Population structure of Uncancylus concentricus (d'Orbigny, 1835) (Ancylidae, Pulmonata, Basommatophora) in the Multiple Use Reserve Martin Garcia Island, Upper Rio de la Plata, Argentina	BRAZILIAN JOURNAL OF BIOLOGY	BRAZ J BIOL		10.1590/S1519-69842012000100008	http://dx.doi.org/10.1590/S1519-69842012000100008	Uncancylus concentricus	Gastropod	Argentina	Ecology	2012
Ovando, XMC; Cuezzo, MG	Constanza Ovando, Ximena Maria; Gabriela Cuezzo, Maria	Discovery of an established population of a non-native species of Viviparidae (Caenogastropoda) in Argentina	MOLLUSCAN RESEARCH	MOLLUSCAN RES				Sinotaia quadrata	Gastropod	Argentina	Conservation	2012
Tamburi, NE; Martín, PR	Tamburi, Nicolas E.; Martin, Pablo R.	Effects of food availability on reproductive output, offspring quality and reproductive efficiency in the apple snail Pomacea canaliculata	BIOLOGICAL INVASIONS	BIOL INVASIONS		10.1007/s10530-011-0047-2	http://dx.doi.org/10.1007/s10530-011-0047-2	Pomacea canaliculata	Gastropod	Argentina	Ecology	2011
De Francesco, CG; Hassan, GS	De Francesco, Claudio G.; Hassan, Gabriela S.	The significance of molluscs as paleoecological indicators of freshwater systems in central-western Argentina	PALAEOGEOGRAPHY PALAEOCLIMATOLOGY PALAEOECOLOGY	PALAEOGEOGR PALAEOCL		10.1016/j.palaeo.2009.01.003	http://dx.doi.org/10.1016/j.palaeo.2009.01.003	Lymnaea viator; Heleobia hatcheri; Heleobia parchappii; Heleobia aff. parchappii; Chilina mendozana; Biomphalaria peregrina; Physa acuta; Sphaeriidae	Gastropod; Gastropod; Gastropod; Gastropod; Gastropod; Gastropod; Gastropod; Bivalve	Argentina	Ecology	2009
Sylvester, F; Boltovskoy, D; Cataldo, D	Sylvester, Francisco; Boltovskoy, Demetrio; Cataldo, Daniel	The invasive bivalve Limnoperna fortunei enhances benthic invertebrate densities in South American floodplain rivers	HYDROBIOLOGIA	HYDROBIOLOGIA		10.1007/s10750-007-0708-4	http://dx.doi.org/10.1007/s10750-007-0708-4	Limnoperna fortunei	Bivalve	Argentina	Conservation	2007
Rumi, A; Gregoric, DEG; Roche, MA	Rumi, Alejandra; Gutierrez Gregoric, Diego E.; Roche, M. Andrea	Growth rate fitting using the von Bertalanffy model:: analysis of natural populations of Drepanotrema spp. snails (Gastropoda: Planorbidae)	REVISTA DE BIOLOGIA TROPICAL	REV BIOL TROP				Drepanotrema depressissimum; Depanotrema lucidum	Gastropod; Gastropod	Argentina	Ecology	2007
Sylvester, F; Boltovskoy, D; Cataldo, DH	Sylvester, Francisco; Boltovskoy, Demetrio; Cataldo, Daniel H.	Fast response of freshwater consumers to a new trophic resource:: Predation on the recently introduced Asian bivalve Limnoperna fortunei in the lower Parana river, South America	AUSTRAL ECOLOGY	AUSTRAL ECOL		10.1111/j.1442-9993.2007.01707.x	http://dx.doi.org/10.1111/j.1442-9993.2007.01707.x	Limnoperna fortunei	Bivalve	Argentina	Conservation	2007
Karatayev, AY; Padilla, DK; Minchin, D; Boltovskoy, D; Burlakova, LE	Karatayev, Alexander Y.; Padilla, Dianna K.; Minchin, Dan; Boltovskoy, Demetrio; Burlakova, Lyubov E.	Changes in global economies and trade: the potential spread of exotic freshwater bivalves	BIOLOGICAL INVASIONS	BIOL INVASIONS		10.1007/s10530-006-9013-9	http://dx.doi.org/10.1007/s10530-006-9013-9	Dreissena polymorpha; Dreissena bugensis; Corbicula fluminea; Corbicula fluminalis; Limnoperna fortunei	Bivalve; Bivalve; Bivalve; Bivalve; Bivalve	Argentina	Ecology	2007
Boltovskoy, D; Correa, N; Cataldo, D; Sylvester, F	Boltovskoy, Demetrio; Correa, Nancy; Cataldo, Daniel; Sylvester, Francisco	Dispersion and ecological impact of the invasive freshwater bivalve Limnoperna fortunei in the Rio de la Plata watershed and beyond	BIOLOGICAL INVASIONS	BIOL INVASIONS		10.1007/s10530-005-5107-z	http://dx.doi.org/10.1007/s10530-005-5107-z	Limnoperna fortunei	Bivalve	Argentina	Ecology	2006
Flores, V; Brugni, N	Flores, V; Brugni, N	Catatropis hatcheri n. sp (Digenea: Notocotylidae) from Heleobia hatcheri (Prosobranchia: Hydrobiidae) and notes on its life-cycle in Patagonia, Argentina	SYSTEMATIC PARASITOLOGY	SYST PARASITOL		10.1007/s11230-005-9004-8	http://dx.doi.org/10.1007/s11230-005-9004-8	Heleobia hatcheri	Gastropod	Argentina	Parasitology	2006
Cataldo, D; Boltovskoy, D; Hermosa, JL; Canzi, C	Cataldo, D; Boltovskoy, D; Hermosa, JL; Canzi, C	Temperature-dependent rates of larval development in Limnoperna fortunei (Bivalvia: Mytilidae)	JOURNAL OF MOLLUSCAN STUDIES	J MOLLUS STUD		10.1093/mollus/eyi005	http://dx.doi.org/10.1093/mollus/eyi005	Limnoperna fortunei	Bivalve	Argentina	Ecology	2005
Sylvester, F; Dorado, J; Boltovskoy, D; Juárez, A; Cataldo, D	Sylvester, F; Dorado, J; Boltovskoy, D; Juárez, A; Cataldo, D	Filtration rates of the invasive pest bivalve Limnoperna fortunei as a function of size and temperature	HYDROBIOLOGIA	HYDROBIOLOGIA		10.1007/s10750-004-1322-3	http://dx.doi.org/10.1007/s10750-004-1322-3	Limnoperna fortunei	Bivalve	Argentina	Ecology	2005
De Francesco, CG; Isla, FI	De Francesco, CG; Isla, FI	The life cycle and growth of Heleobia australis (D'Orbigny, 1835) and H-Conexa (Gaillard, 1974) (Gastropoda: Rissooidea) in Mar Chiquita coastal lagoon (Argentina)	JOURNAL OF MOLLUSCAN STUDIES	J MOLLUS STUD		10.1093/mollus/70.2.173	http://dx.doi.org/10.1093/mollus/70.2.173	Heleobia australis; Heleobia conexa	Gastropod; Gastropod	Argentina	Morphology	2004
Diupotex-Chong, ME; Cazzaniga, NJ; Hernández-Santoyo, A; Betancourt-Rule, JM	Diupotex-Chong, ME; Cazzaniga, NJ; Hernández-Santoyo, A; Betancourt-Rule, JM	Karyotype description of Pomacea patula catemacensis (Caenogastropoda, Ampullariidae), with an assessment of the taxonomic status of Pomacea patula	BIOCELL	BIOCELL				Pomacea patula catemacensis	Gastropod	Argentina	Genetics	2004
Carreón-Palau, L; Uria-Galicia, E; Espinosa-Chávez, F; Martínez-Jerónimo, F	Carreón-Palau, L; Uria-Galicia, E; Espinosa-Chávez, F; Martínez-Jerónimo, F	Morphological and histological development of the reproductive system of Pomacea patula catemacensis (Baker 1922) (Mollusca, Caenogastropoda: Ampullariidae)	REVISTA CHILENA DE HISTORIA NATURAL	REV CHIL HIST NAT				Pomacea patula catemacensis	Gastropod	Argentina	Morphology; Physiology	2003
Estebenet, AL; Cazzaniga, NJ; Pizani, NV	Estebenet, AL; Cazzaniga, NJ; Pizani, NV	The natural diet of the Argentinean endemic snail Chilina parchappii (Basommatophora: Chilinidae) and two other coexisting pulmonate gastropods	VELIGER	VELIGER				Chilina parchappii	Gastropod	Argentina	Ecology	2002
Darrigran, G; de Drago, IE	Darrigran, G; de Drago, IE	Invasion of the exotic freshwater mussel Limnoperna fortunei (Dunker, 1857) (Bivalvia: Mytilidae) in South America	NAUTILUS	NAUTILUS				Limnoperna fortunei	Bivalve	Argentina	Conservation	2000
Villar, C; Stripeikis, J; D'Huicque, L; Tudino, M; Troccoli, O; Bonetto, C	Villar, C; Stripeikis, J; D'Huicque, L; Tudino, M; Troccoli, O; Bonetto, C	Cd, Cu and Zn concentrations in sediments and the invasive bivalves Limnoperna fortunei and Corbicula fluminea at the Rio de la Plata basin, Argentina	HYDROBIOLOGIA	HYDROBIOLOGIA		10.1023/A:1003811223880	http://dx.doi.org/10.1023/A:1003811223880	Limnoperna fortunei; Corbicula fluminea	Bivalve; Bivalve	Argentina	Physiology	1999
Boltovskoy, D; Izaguirre, I; Correa, N	Boltovskoy, D; Izaguirre, I; Correa, N	Feeding selectivity of Corbicula fluminea (Bivalvia) on natural phytoplankton	HYDROBIOLOGIA	HYDROBIOLOGIA		10.1007/BF00015510	http://dx.doi.org/10.1007/BF00015510	Corbicula fluminea	Bivalve	Argentina	Ecology; Conservation	1995
Vogler, RE; Beltramino, AA; Strong, EE; Rumi, A; Peso, JG	Vogler, Roberto E.; Beltramino, Ariel A.; Strong, Ellen E.; Rumi, Alejandra; Peso, Juana G.	Insights into the Evolutionary History of an Extinct South American Freshwater Snail Based on Historical DNA	PLOS ONE	PLOS ONE	-	10.1371/journal.pone.0169191	http://dx.doi.org/10.1371/journal.pone.0169191	Aylacostoma chloroticum; Aylacostoma brunneum; Aylacostoma stigmaticum; Aylacostoma guaraniticum	Gastropod; Gastropod; Gastropod; Gastropod	Argentina; Paraguay	Evolution	2016
Vogler, RE; Beltramino, AA; Peso, JG; Rumi, A	Vogler, Roberto E.; Beltramino, Ariel A.; Peso, Juana G.; Rumi, Alejandra	Threatened gastropods under the evolutionary genetic species concept: redescription and new species of the genus Aylacostoma (Gastropoda: Thiaridae) from High Parana River (Argentina-Paraguay)	ZOOLOGICAL JOURNAL OF THE LINNEAN SOCIETY	ZOOL J LINN SOC-LOND		10.1111/zoj.12179	http://dx.doi.org/10.1111/zoj.12179	Aylacostoma brunneum	Gastropod	Argentina; Paraguay	Taxonomy	2014
Vogler, RE; Beltramino, AA; Gutiérrez-Gregoric, DE; Peso, JG; Griffin, M; Rumi, A	Vogler, Roberto E.; Beltramino, Ariel A.; Gutierrez-Gregoric, Diego E.; Peso, Juana G.; Griffin, Miguel; Rumi, Alejandra	Threatened Neotropical mollusks: analysis of shape differences in three endemic snails from High Parana River by geometric morphometrics	REVISTA MEXICANA DE BIODIVERSIDAD	REV MEX BIODIVERS		10.7550/rmb.26165	http://dx.doi.org/10.7550/rmb.26165	Aylacostoma chloroticum; Aylacostoma stigmaticum; Aylacostoma guaraniticum	Gastropod; Gastropod; Gastropod	Argentina; Paraguay	Morphology	2012
Peso, JG; Pérez, DC; Vogler, RE	Peso, Juana G.; Perez, Diego C.; Vogler, Roberto E.	The invasive snail Melanoides tuberculata in Argentina and Paraguay	LIMNOLOGICA	LIMNOLOGICA		10.1016/j.limno.2010.12.001	http://dx.doi.org/10.1016/j.limno.2010.12.001	Melanoides tuberculata	Gastropod	Argentina; Paraguay	Conservation	2011
Boltovskoy, D; Bordet, F; Leites, V; Cataldo, D	Boltovskoy, Demetrio; Bordet, Facundo; Leites, Valentin; Cataldo, Daniel	Multiannual trends (2004-2019) in the abundance of larvae of the invasive mussel Limnoperna fortunei and crustacean zooplankton in a large South American reservoir	AUSTRAL ECOLOGY	AUSTRAL ECOL	Lotic	10.1111/aec.13058	http://dx.doi.org/10.1111/aec.13058	Limnoperna fortunei	Bivalve	Argentina; Uruguay	Ecology; Conservation	2021
Pointier, JP; Paraense, WL; DeJong, RJ; Loker, ES; Bargues, MD; Mas-Coma, S	Pointier, JP; Paraense, WL; DeJong, RJ; Loker, ES; Bargues, MD; Mas-Coma, S	A potential snail host of schistosomiasis in Bolivia:: Biomphalaria amazonica Paraense, 1966	MEMORIAS DO INSTITUTO OSWALDO CRUZ	MEM I OSWALDO CRUZ		10.1590/S0074-02762002000600007	http://dx.doi.org/10.1590/S0074-02762002000600007	Biomphalaria amazonica	Gastropod	Bolivia	Parasitology	2002
Coelho, PRS; Thiengo, SC; de Mendonça, CLF; de Oliveira, NMT; dos Santos, SB; Caldeira, RL; Geiger, SM	Coelho, Paulo Ricardo Silva; Thiengo, Silvana Carvalho; de Mendonca, Cristiane Lafeta Furtado; de Oliveira, Nathalia Moreira Teodoro; dos Santos, Sonia Barbosa; Caldeira, Roberta Lima; Geiger, Stefan Michael	Diversity of Freshwater Mollusks from Lake Pampulha, Municipality of Belo Horizonte, Minas Gerais, Brazil	DIVERSITY-BASEL	DIVERSITY-BASEL	Lentic	10.3390/d16040193	http://dx.doi.org/10.3390/d16040193	Biomphalaria straminea; Biomphalaria kuhniana; Biomphalaria occidentalis; Drepanotrema cimex; Gundlachia ticaga; Physa acuta; Stenophysa marmorata; Pseudosuccinea columella; Melanoides tuberculata; Pomacea maculata; Omalonyx matheroni; Corbicula largillierti	Gastropod; Gastropod; Gastropod; Gastropod; Gastropod; Gastropod; Gastropod; Gastropod; Gastropod; Gastropod; Gastropod; Bivalve	Brasil	Conservation	2024
Coelho, PRS; Ker, FTO; Araujo, AD; Pinto, HA; Negrao-Corrêa, DA; Caldeira, RL; Geiger, SM	Coelho, Paulo R. S.; Ker, Fabricio T. O.; Araujo, Amanda D.; Pinto, Hudson A.; Negrao-Correa, Deborah A.; Caldeira, Roberta L.; Geiger, Stefan M.	Survey on Limnic Gastropods: Relationships between Human Health and Conservation	PATHOGENS	PATHOGENS	-	10.3390/pathogens11121533	http://dx.doi.org/10.3390/pathogens11121533	Biomphalaria sp.; Drepanotrema cimex; Pseudosuccinea columella; Stenophysa marmorata; Omalonyx sp.; Pomacea sp.	Gastropod; Gastropod; Gastropod; Gastropod; Gastropod; Gastropod	Brasil	Conservation; Parasitology	2022
Miyahira, IC; Mansur, MCD; de Lacerda, LEM; Gonçalves, ICB; Sant'Anna, GG; dos Santos, SB	Miyahira, Igor Christo; Dreher Mansur, Maria Cristina; Macedo de Lacerda, Luiz Eduardo; Brito Goncalves, Isabela Cristina; Sant'Anna, Glauco Gil; dos Santos, Sonia Barbosa	Protected areas and native freshwater bivalves are not in the same place in south-east Brazil	AQUATIC CONSERVATION-MARINE AND FRESHWATER ECOSYSTEMS	AQUAT CONSERV	Both	10.1002/aqc.3904	http://dx.doi.org/10.1002/aqc.3904	Anodontites trapesialis; Anodontites obtusus; Diplodon ellipticus; Diplodon multistriatus; Diplodon sp.; Rhipidodonta garbei; Corbicula fluminea; Corbicula largillierti	Bivalve; Bivalve; Bivalve; Bivalve; Bivalve; Bivalve; Bivalve; Bivalve	Brasil	Conservation	2022
Linares, MS; Macedo, DR; Marques, JC; Callisto, M	Linares, Marden Seabra; Macedo, Diego Rodrigues; Marques, Joao Carlos; Callisto, Marcos	Anthropogenically physically changed habitats enable an easier propagation of invasive bivalve in neotropical headwater streams	BIOLOGICAL INVASIONS	BIOL INVASIONS	-	10.1007/s10530-022-02886-4	http://dx.doi.org/10.1007/s10530-022-02886-4	Corbicula fluminea	Bivalve	Brasil	Ecology	2022
Ayroza, DMMD; de Melo, TJ; Faria-Pereira, LP; Petesse, ML; Rebelo, MD; do Carmo, CF; Cataldo, DH	de Rezende Ayroza, Daercy Maria Monteiro; de Melo, Taissa Juliana; Faria-Pereira, Lilian Paula; Petesse, Maria Letizia; Rebelo, Mauro de Freitas; do Carmo, Clovis Ferreira; Cataldo, Daniel Hugo	Limnoperna fortunei colonization and macrofouling on net cages in a subtropical reservoir (Brazil)	AQUACULTURE RESEARCH	AQUAC RES	Lotic	10.1111/are.15417	http://dx.doi.org/10.1111/are.15417	Limnoperna fortunei	Bivalve	Brasil	Ecology	2021
Simeone, D; Tagliaro, CH; Beasley, CR	Simeone, Diego; Tagliaro, Claudia Helena; Beasley, Colin Robert	Amazonian freshwater mussel density: A useful indicator of macroinvertebrate assemblage and habitat quality	ECOLOGICAL INDICATORS	ECOL INDIC	Both	10.1016/j.ecolind.2020.107300	http://dx.doi.org/10.1016/j.ecolind.2020.107300	Castalia ambigua; Anodontites elongatus	Bivalve; Bivalve	Brasil	Conservation; Ecology	2021
de Andrade, PDB; Razzolini, E; Baggio, RA	Borges de Andrade, Patricia Dammski; Razzolini, Emanuel; Baggio, Rafael Antunes	I See Golden Mussel! They are Everywhere! Environmental DNA Supports Widespread Dissemination of Limnoperna fortunei in Hydrographic Basins in the Parana State, Brazil	BRAZILIAN ARCHIVES OF BIOLOGY AND TECHNOLOGY	BRAZ ARCH BIOL TECHN	Lentic	10.1590/1678-4324-75years-2021210149	http://dx.doi.org/10.1590/1678-4324-75years-2021210149	Limnoperna fortunei	Bivalve	Brasil	Conservation	2021
Hermes-Silva, S; Ribolli, J; de Avila-Simas, S; Zaniboni, E; Cardoso, GFM; Nuñer, APD	Hermes-Silva, Samara; Ribolli, Josiane; de Avila-Simas, Sunshine; Zaniboni-Filho, Evoy; Minatto Cardoso, Grasiela Fagundes; de Oliveira Nuner, Alex Pires	Limnoperna fortunei - Updating the geographic distribution in the Brazilian watersheds and mapping the regional occurrence in the Upper Uruguay River basin	BIOTA NEOTROPICA	BIOTA NEOTROP	Both	10.1590/1676-0611-BN-2020-1175	http://dx.doi.org/10.1590/1676-0611-BN-2020-1175	Limnoperna fortunei	Bivalve	Brasil	Conservation	2021
Leal, MF; Simone, LRL; Castro, ES; Dos Santos, O; Da Silva, ARV; Dantas, KKS; De Sousa, JH; Da Silva, EL; Pinheiro, TG; Lacerda, ACF	Leal, Manuella F.; Simone, Luiz Ricardo L.; Castro, Emerson S.; Dos Santos, Orianna; Da Silva, Antonia R., V; Dantas, Karina K. S.; De Sousa, Joao H.; Da Silva, Edson L.; Pinheiro, Tamaris G.; Lacerda, Ana Carolina F.	Malacofauna of lotic environments in the Northeast and Brazilian semiarid region: current knowledge and new records	ANAIS DA ACADEMIA BRASILEIRA DE CIENCIAS	AN ACAD BRAS CIENC	Lotic	10.1590/0001-3765202120210140	http://dx.doi.org/10.1590/0001-3765202120210140	Biomphalaria straminea; Drepanotrema lucidum; Drepanotrema cimex; Drepanotrema depressissimum; Drepanotrema schubarti; Uncancylus concentricus; Melanoides tuberculatus; Pomacea canaliculata; Stenophysa marmorata; Pisidium dorbignyi; Corbicula fluminea	Gastropod; Gastropod; Gastropod; Gastropod; Gastropod; Gastropod; Gastropod; Gastropod; Gastropod; Bivalve; Bivalve	Brasil	Conservation	2021
Leal, MF; de Simone, LRL; Lacerda, ACF; da Silva, EL; Pinheiro, TG	Leal, Manuella Feitosa; Lopes de Simone, Luiz Ricardo; Figueiredo Lacerda, Ana Carolina; da Silva, Edson Lourenco; Pinheiro, Tamaris Gimenez	Current distribution of the invasive mollusk Corbicula fluminea (O.F. Muller, 1774) (Bivalvia, Cyrenidae) in Brazil, including a new record from the state of Piaui	CHECK LIST	CHECK LIST	-	10.15560/17.1.151	http://dx.doi.org/10.15560/17.1.151	Corbicula fluminea	Bivalve	Brasil	Conservation	2021
Olivera-Hyde, M; Hallerman, E; Santos, R; Jones, J; Varnerin, B; Neto, GDS; Mansur, MC; Moraleco, P; Callil, C	Olivera-Hyde, Miluska; Hallerman, Eric; Santos, Rogerio; Jones, Jess; Varnerin, Brianne; Santos Neto, Guilherme da Cruz; Mansur, Maria Cristina; Moraleco, Priscilla; Callil, Claudia	Phylogenetic Assessment of Freshwater Mussels Castalia ambigua and C. inflata at an Ecotone in the Paraguay River Basin, Brazil Shows That Inflated and Compressed Shell Morphotypes Are the Same Species	DIVERSITY-BASEL	DIVERSITY-BASEL	Lotic	10.3390/d12120481	http://dx.doi.org/10.3390/d12120481	Castalia inflata; Castalia ambigua	Bivalve; Bivalve	Brasil	Morphology; Genetics; Evolution	2020
Miyahira, IC; Pereira, LS; dos Santos, LN	Miyahira, Igor Christo; Pereira, Larissa Strictar; dos Santos, Luciano Neves	Non-native freshwater molluscs in the Neotropics: what can be learned from Brazilian reservoirs?	AQUATIC INVASIONS	AQUAT INVASIONS	Lentic	10.3391/ai.2020.15.3.06	http://dx.doi.org/10.3391/ai.2020.15.3.06	Melanoides tuberculata; Physa acuta; Ferissia fragilis; Corbicula fluminea; Corbicula largillierti; Limnoperna fortunei	Gastropod; Gastropod; Gastropod; Bivalve; Bivalve; Bivalve	Brasil	Conservation	2020
Santos, RCL; Callil, CT; Landeiro, VL	Santos, Rogerio C. Lima; Callil, Claudia Tasso; Landeiro, Victor Lemes	Unraveling the effects of water-sediment conditions and spatial patterns on Unionida assemblages in seasonally connected floodplain lakes	HYDROBIOLOGIA	HYDROBIOLOGIA	Lentic	10.1007/s10750-020-04290-2	http://dx.doi.org/10.1007/s10750-020-04290-2	Anodontites trapesialis; Anodontites elongatus; Anodontites (Lamproscapha) ensiformis; Castalia inflata; Mycetopoda siliquosa; Diplodon parallelopipedon	Bivalve; Bivalve; Bivalve; Bivalve; Bivalve; Bivalve	Brasil	Conservation	2020
Barros, MRF; Chagas, RA; Herrmann, M; Bezerra, AM	Barros, M. R. F.; Chagas, R. A.; Herrmann, M.; Bezerra, A. M.	New record of the invasive snail Melanoides tuberculata (Gastropoda, Thiaridae) - Ceara State, Brazil	BRAZILIAN JOURNAL OF BIOLOGY	BRAZ J BIOL	Lotic	10.1590/1519-6984.210408	http://dx.doi.org/10.1590/1519-6984.210408	Melanoides tuberculata	Gastropod	Brasil	Conservation	2020
da Silva, EL; da Rocha, AJ; Leal, MF; dos Santos, O; de Sousa, JH; da Silva, ARV; Dantas, KKS; Rulim, EMM; Castro, ES; Pacheco, ACL; Pinheiro, TG	da Silva, Edson Lourenco; da Rocha, Adriana Josefa; Leal, Manuella Feitosa; dos Santos, Orianna; de Sousa, Joao Hemerson; Viana da Silva, Antonia Rafaela; Silva Dantas, Karina Ketelen; Matos Rulim, Erika Maria; Castro, Emerson Santos; Landim Pacheco, Ana Carolina; Pinheiro, Tamaris Gimenez	Freshwater mollusks from three reservoirs of Piaui, northeastern Brazil	BIOTA NEOTROPICA	BIOTA NEOTROP	Lentic	10.1590/1676-0611-BN-2019-0868	http://dx.doi.org/10.1590/1676-0611-BN-2019-0868	Biomphalaria straminea; Melanoides tuberculata; Pomacea lineata; Biomphalaria straminea; Melanoides tuberculata; Pomacea lineata; Biomphalaria straminea; Melanoides tuberculata; Pomacea lineata	Gastropod; Gastropod; Gastropod; Gastropod; Gastropod; Gastropod; Gastropod; Gastropod	Brasil	Conservation	2020
Miyahira, IC; Mansur, MCD; Pimpao, DM; Couceir, SRM; dos Santos, SB	Miyahira, Igor Christo; Dreher Mansur, Maria Cristina; Pimpao, Daniel Mansur; Marques Couceir, Sheyla Regina; dos Santos, Sonia Barbosa	Morphology and distribution of the freshwater mussel Diplodon granosus, a rare and poorly understood species	ACTA AMAZONICA	ACTA AMAZON	Both	10.1590/1809-4392201903910	http://dx.doi.org/10.1590/1809-4392201903910	Diplodon granosus	Bivalve	Brasil	Morphology; Taxonomy; Conservation	2020
Ohlweiler, FP; Rossignoli, TD; Palasio, RGS; Tuan, R	Ohlweiler, Fernanda Pires; Rossignoli, Thays de Jesus; Sanches Palasio, Raquel Gardini; Tuan, Roseli	Taxonomic diversity of Biomphalaria (Planorbidae) in Sao Paulo state, Brazil	BIOTA NEOTROPICA	BIOTA NEOTROP	Both	10.1590/1676-0611-BN-2020-0975	http://dx.doi.org/10.1590/1676-0611-BN-2020-0975	Biomphalaria occidentalis; Biomphalaria oligoza; Biomphalaria peregrina; Biomphalaria schrammi; Biomphalaria straminea; Biomphalaria tenagophila	Gastropod; Gastropod; Gastropod; Gastropod; Gastropod; Gastropod	Brasil	Taxonomy; Morphology	2020
Paschoal, LRP; Andrade, DP; Pimpao, DM; Torres, S; Darrigran, G	Paschoal, Lucas R. P.; Andrade, Douglas P.; Pimpao, Daniel M.; Torres, Santiago; Darrigran, Gustavo	Massive mortality of the giant freshwater mussel Anodontites trapesialis (Lamarck, 1819) (Bivalvia: Mycetopodidae) during a severe drought in a Neotropical reservoir	ANAIS DA ACADEMIA BRASILEIRA DE CIENCIAS	AN ACAD BRAS CIENC	-	10.159010001-3765202020180811	http://dx.doi.org/10.159010001-3765202020180811	Anodontites trapesialis	Bivalve	Brasil	Physiology; Conservation	2020
de Avila-Simas, S; Morato, MM; Reynalte-Tataje, DA; Silveira, HB; Zaniboni, E; Normey-Rico, JE	de Avila-Simas, Sunshine; Morato, Marcelo M.; Reynalte-Tataje, David A.; Silveira, Hector B.; Zaniboni-Filho, Evoy; Normey-Rico, Julio E.	Model-based predictive control for the regulation of the golden mussel Limnoperna fortunei (Dunker, 1857)	ECOLOGICAL MODELLING	ECOL MODEL	-	10.1016/j.ecolmodel.2019.05.010	http://dx.doi.org/10.1016/j.ecolmodel.2019.05.010	Limnoperna fortunei	Bivalve	Brasil	Ecology	2019
Miyahira, IC; Mansur, MCD; dos Santos, SB	Miyahira, Igor Christo; Dreher Mansur, Maria Cristina; dos Santos, Sonia Barbosa	Redescription of Diplodon ellipticus Spix in Wagner, 1827, Diplodon multistriatus (Lea, 1831), and Rhipidodonta garbei (Ihering, 1910) (Bivalvia: Hyriidae) from coastal rivers of eastern and northeastern Brazil	ARCHIV FUR MOLLUSKENKUNDE	ARCH MOLLUSKENKD	Lotic	10.1127/arch.moll/148/009-034	http://dx.doi.org/10.1127/arch.moll/148/009-034	Diplodon ellipticus; Diplodon ellipticus; Diplodon multistriatus	Bivalve; Bivalve; Bivalve	Brasil	Taxonomy	2019
da Mata, LS; Tagliaro, CH; Simeone, D; Beasley, CR	da Mata, Liliane Sousa; Tagliaro, Claudia Helena; Simeone, Diego; Beasley, Colin Robert	Shell shape variation in Amazonian freshwater mussels (Unionida: Hyriidae: Hyriini)	JOURNAL OF MOLLUSCAN STUDIES	J MOLLUS STUD	-	10.1093/mollus/eyz001	http://dx.doi.org/10.1093/mollus/eyz001	Triplodon corrugatus; Paxyodon syrmatophorus; Prisodon obliquus	Bivalve; Bivalve; Bivalve	Brasil	Morphology	2019
Furlan-Murari, PJ; Ruas, CD; Ruas, EA; Benício, LM; Urrea-Rojas, AM; Poveda-Parra, AR; Murari, E; de Lima, ECS; de Souza, FP; Lopera-Barrero, NM	Furlan-Murari, Pamela Juliana; Ruas, Claudete de Fatima; Ruas, Eduardo Augusto; Benicio, Lucas Milanez; Urrea-Rojas, Angela Maria; Poveda-Parra, Angela Rocio; Murari, Emerson; Suzuki de Lima, Ed Christian; de Souza, Felipe Pinheiro; Lopera-Barrero, Nelson Mauricio	Structure and genetic variability of golden mussel (Limnoperna fortunei) populations from Brazilian reservoirs	ECOLOGY AND EVOLUTION	ECOL EVOL	Lotic	10.1002/ece3.4941	http://dx.doi.org/10.1002/ece3.4941	Limnoperna fortunei	Bivalve	Brasil	Genetics	2019
Palasio, RGS; Xavier, IG; Chiaravalotti, R; Tuan, R	Sanches Palasio, Raquel Gardini; Xavier, Iara Giordano; Chiaravalotti-Neto, Rancisco; Tuan, Roseli	Diversity of Biomphalaria spp. freshwater snails and associated mollusks in areas with schistosomiasis risk, using molecular and spatial analysis tools	BIOTA NEOTROPICA	BIOTA NEOTROP	-	10.1590/1676-0611-BN-2019-0746	http://dx.doi.org/10.1590/1676-0611-BN-2019-0746	Biomphalaria occidentalis; Biomphalaria tenagophila; Biomphalaria glabrata; Biomphalaria straminea; Biomphalaria peregrina	Gastropod; Gastropod; Gastropod; Gastropod; Gastropod	Brasil	Genetics	2019
Barbosa, NPU; Ferreira, JA; Nascimento, CAR; Silva, FA; Carvalho, VA; Xavier, ERS; Ramon, L; Almeida, AC; Carvalho, MD; Cardoso, AV	Barbosa, Newton P. U.; Ferreira, Jacqueline A.; Nascimento, Cesar A. R.; Silva, Fabiano A.; Carvalho, Vinicius A.; Xavier, Eric R. S.; Ramon, Lucas; Almeida, Arthur C.; Carvalho, Marcela D.; Cardoso, Antonio, V	Prediction of future risk of invasion by Limnoperna fortunei (Dunker, 1857) (Mollusca, Bivalvia, Mytilidae) in Brazil with cellular automata	ECOLOGICAL INDICATORS	ECOL INDIC	Both	10.1016/j.ecolind.2018.01.005	http://dx.doi.org/10.1016/j.ecolind.2018.01.005	Limnoperna fortunei	Bivalve	Brasil	Ecology	2018
Bichuette, ME; Trajano, E	Bichuette, Maria Elina; Trajano, Eleonora	Diversity of Potamolithus (Littorinimorpha, Truncatelloidea) in a high-diversity spot for troglobites in southeastern Brazil: role of habitat fragmentation in the origin of subterranean fauna, and conservation status	SUBTERRANEAN BIOLOGY	SUBTERR BIOL	Lentic	10.3897/subtbiol.25.23778	http://dx.doi.org/10.3897/subtbiol.25.23778	Potamolithus spp.	Gastropod	Brasil	Morphology	2018
Callil, CT; Leite, MCS; Mateus, LAF; Jones, JW	Callil, Claudia T.; Leite, Marilene C. S.; Mateus, LAcia A. F.; Jones, Jess W.	Influence of the flood pulse on reproduction and growth of Anodontites trapesialis (Lamarck, 1819) (Bivalvia: Mycetopodidae) in the Pantanal wetland, Brazil	HYDROBIOLOGIA	HYDROBIOLOGIA	Lentic	10.1007/s10750-017-3097-3	http://dx.doi.org/10.1007/s10750-017-3097-3	Anodontites trapesialis	Bivalve	Brasil	Morphology	2018
Martello, AR; Kotzian, CB; Erthal, F	Martello, Alcemar Rodrigues; Kotzian, Carla Bender; Erthal, Fernando	The role of topography, river size and riverbed grain size on the preservation of riverine mollusk shells	JOURNAL OF PALEOLIMNOLOGY	J PALEOLIMNOL	Lotic	10.1007/s10933-017-0010-z	http://dx.doi.org/10.1007/s10933-017-0010-z	Asolene spixi; Pomacea americanista; Pomacea canaliculata; Pomella megastoma; Biomphalaria tenagophila; Biomphalaria straminea; Drepanotrema depressissimum; Drepanotrema kermatoides; Anisancylus obliquus; Hebetancylus moricandi; Uncancylus concentricus; Lymnaea columela; Aplexa marmorata; Potamolithus aff. Buschi; Potamolithus catharinae; Potamolithus ribeirensis; Heleobia bertoniana; Eupera elli…	Gastropod; Gastropod; Gastropod; Gastropod; Gastropod; Gastropod; Gastropod; Gastropod; Gastropod; Gastropod; Gastropod; Gastropod; Gastropod; Gastropod; Gastropod; Gastropod; Gastropod; Bivalve; Bivalve; Bivalve; Bivalve; Bivalve; Bivalve; Bivalve; Bivalve; Bivalve; Bivalve; Bivalve; Bivalve; Bivalve; Bivalve; Bivalve; Bivalve; Bivalve; Bivalve; Bivalve; Bivalve; Bivalve; Bivalve; Bivalve	Brasil	Paleontology	2018
Bezerra, FSD; Pinheiro, MCC; da Silva, JD; de Castro, IMN; Caldeira, RL; Sousa, MS; Cavalcante, AB; Ramosr, AN	de Moraes Bezerra, Fernando Schemelzer; Cunha Pinheiro, Marta Cristhiany; da Silva Filho, Jose Damiao; Nogueira de Castro, Issis Maria; Caldeira, Roberta Lima; Sousa, Mariana Silva; Cavalcante, Albeniza Barbosa; Ramos Junior, Alberto Novaes	Identification of Biomphalaria sp and other freshwater snails in the large-scale water transposition project in the Northeast of Brazil	REVISTA DO INSTITUTO DE MEDICINA TROPICAL DE SAO PAULO	REV INST MED TROP SP	Both	10.1590/S1678-9946201860041	http://dx.doi.org/10.1590/S1678-9946201860041	Biomphalaria spp.; Drepanotrema spp.; Melanoides spp.; Pomacea spp.	Gastropod; Gastropod; Gastropod; Gastropod	Brasil	Parasitology	2018
Utida, G; Oliveira, EC; Tucker, M; Petri, S; Boggiani, PC	Utida, Giselle; Oliveira, Emiliano Castro; Tucker, Maurice; Petri, Setembrino; Boggiani, Paulo Cesar	Palaeoenvironmental interpretations based on molluscs from mid-Holocene lacustrine limestones, Mato Grosso do Sul, Brazil	QUATERNARY INTERNATIONAL	QUATERN INT	Lentic	10.1016/j.quaint.2016.11.007	http://dx.doi.org/10.1016/j.quaint.2016.11.007	Pomacea canaliculata; Biomphalaria sp.; Idiopyrgus sp.; Marisa sp.; Megalobulimus sp.; Pisidium sp.	Gastropod; Gastropod; Gastropod; Gastropod; Gastropod; Bivalve	Brasil	Paleontology	2017
Borges, PD; Ludwig, S; Boeger, WA	Borges, Patricia Dammski; Ludwig, Sandra; Boeger, Walter A.	Testing hypotheses on the origin and dispersion of Limnoperna fortunei (Bivalvia, Mytilidae) in the Iguassu River (Parana, Brazil): molecular markers in larvae and adults	LIMNOLOGY	LIMNOLOGY	Lotic	10.1007/s10201-016-0485-8	http://dx.doi.org/10.1007/s10201-016-0485-8	Limnoperna fortunei	Bivalve	Brasil	Genetics	2017
dos Santos, RN; Campos, FS; de Albuquerque, NRM; Finoketti, F; Côrrea, RA; Cano-Ortiz, L; Assis, FL; Arantes, TS; Roehe, PM; Franco, AC	dos Santos, Raissa Nunes; Campos, Fabricio Souza; Medeiros de Albuquerque, Nathalia Ramme; Finoketti, Fernando; Correa, Rayra Almeida; Cano-Ortiz, Lucia; Assis, Felipe Lopes; Arantes, Thalita Souza; Roehe, Paulo Michel; Franco, Ana Claudia	A new marseillevirus isolated in Southern Brazil from Limnoperna fortunei	SCIENTIFIC REPORTS	SCI REP-UK	-	10.1038/srep35237	http://dx.doi.org/10.1038/srep35237	Limnoperna fortunei	Bivalve	Brasil	Parasitology	2016
Santos-Neto, GD; Beasley, CR; Schneider, H; Pimpao, DM; Hoeh, WR; de Simone, LRL; Tagliaro, CH	Santos-Neto, Guilherme da Cruz; Beasley, Colin Robert; Schneider, Horacio; Pimpao, Daniel Mansur; Hoeh, Walter Randolph; Lopes de Simone, Luiz Ricardo; Tagliaro, Claudia Helena	Genetic relationships among freshwater mussel species from fifteen Amazonian rivers and inferences on the evolution of the Hyriidae (Mollusca: Bivalvia: Unionida)	MOLECULAR PHYLOGENETICS AND EVOLUTION	MOL PHYLOGENET EVOL	Lotic	10.1016/j.ympev.2016.04.013	http://dx.doi.org/10.1016/j.ympev.2016.04.013	Paxyodon syrmatophorus; Triplodon corrugatus; Prisodon obliquus; Castalia ambigua; Castalia quadrata; Castalia stevensi; Callonaia duprei; Diplodon suavidicus; Diplodon demeraraensis	Bivalve; Bivalve; Bivalve; Bivalve; Bivalve; Bivalve; Bivalve; Bivalve; Bivalve	Brasil	Evolution; Genetics	2016
Silveira, TCL; Gama, AMS; Alves, TP; Fontoura, NF	Silveira, T. C. L.; Gama, A. M. S.; Alves, T. P.; Fontoura, N. F.	Modeling habitat suitability of the invasive clam Corbicula fluminea in a Neotropical shallow lagoon, southern Brazil	BRAZILIAN JOURNAL OF BIOLOGY	BRAZ J BIOL	Lentic	10.1590/1519-6984.01915	http://dx.doi.org/10.1590/1519-6984.01915	Corbicula fluminea	Bivalve	Brasil	Ecology	2016
Dei Tos, C; Quagio-Grassiotto, I; Mazzoni, TS	Dei Tos, Claudenice; Quagio-Grassiotto, Irani; Mazzoni, Talita Sarah	Cellular development of the germinal epithelium during the gametogenic cycle of the golden mussel Limnoperna fortunei (Bivalvia: Mytilidae)	REVISTA DE BIOLOGIA TROPICAL	REV BIOL TROP	-	10.15517/rbt.v64i2.18837	http://dx.doi.org/10.15517/rbt.v64i2.18837	Limnoperna fortunei	Bivalve	Brasil	Conservation	2016
Alves, T; Lima, P; Lima, GMS; Cunha, MCC; Ferreira, S; Domingues, B; Machado, J	Alves, T.; Lima, P.; Lima, G. M. S.; Cunha, M. C. C.; Ferreira, S.; Domingues, B.; Machado, J.	Phytoplankton composition of the water and gastrointestinal tract of the mussel Diplodon enno (Ortmann, 1921) from Sao Francisco river (Bahia, Brazil)	BRAZILIAN JOURNAL OF BIOLOGY	BRAZ J BIOL	Lotic	10.1590/1519-6984.14514	http://dx.doi.org/10.1590/1519-6984.14514	Diplodon enno	Bivalve	Brasil	Ecology	2016
Campos, MDS; Peifer, D; Castro, PD	Souza Campos, Monica de Cassia; Peifer, Daniel; Castro, Paulo de Tarso	The ShearStress importance on the spatial distribution pattern of the invader Limnoperna fortunei in the Upper Parana River Basin. - An assessment based on the Spatial Distribution Models	BIOTA NEOTROPICA	BIOTA NEOTROP	Lotic	10.1590/1676-0611-BN-2014-0164	http://dx.doi.org/10.1590/1676-0611-BN-2014-0164	Limnoperna fortunei	Bivalve	Brasil	Ecology	2016
Palasio, RGS; Casotti, MO; Rodrigues, TC; Menezes, RMT; Zanotti-Magalhaes, EM; Tuan, R	Sanches Palasio, Raquel Gardini; Casotti, Marcia Oliveira; Rodrigues, Thamiris Cassia; Tirone Menezes, Regiane Maria; Zanotti-Magalhaes, Eliana Maria; Tuan, Roseli	The current distribution pattern of Biomphalaria tenagophila and Biomphalaria straminea in the northern and southern regions of the coastal fluvial plain in the state of Sao Paulo	BIOTA NEOTROPICA	BIOTA NEOTROP	Lotic	10.1590/1676-06032015015314	http://dx.doi.org/10.1590/1676-06032015015314	Biomphalaria tenagophila; Biomphalaria straminea	Gastropod	Brasil	Conservation	2015
Paschoal, LRP; Andrade, DP; Darrigran, G	Paschoal, L. R. P.; Andrade, D. P.; Darrigran, G.	How the fluctuations of water levels affect populations of invasive bivalve Corbicula fluminea (Muller, 1774) in a Neotropical reservoir?	BRAZILIAN JOURNAL OF BIOLOGY	BRAZ J BIOL	Both	10.1590/1519-6984.09113	http://dx.doi.org/10.1590/1519-6984.09113	Corbicula fluminea	Bivalve	Brasil	Conservation	2015
Salvador, RB; Cavallari, DC	Salvador, Rodrigo B.; Cavallari, Daniel C.	A new species of Leiostracus (Gastropoda, Pulmonata, Orthalicoidea) from Espirito Santo, Brazil	IHERINGIA SERIE ZOOLOGIA	IHERINGIA SER ZOOL		10.1590/1678-476620141043364366	http://dx.doi.org/10.1590/1678-476620141043364366	Leiostracus faerie	Gastropod	Brasil	Taxonomy	2014
Barbosa, FG	Barbosa, Fabiana G.	The scientific literature on Limnoperna fortunei (Dunker 1857) from 1982 to 2012	ANAIS DA ACADEMIA BRASILEIRA DE CIENCIAS	AN ACAD BRAS CIENC		10.1590/0001-3765201420130281	http://dx.doi.org/10.1590/0001-3765201420130281	Limnoperna fortunei	Bivalve	Brasil	Taxonomy	2014
Fernandez, MA; de Mattos, AC; da Silva, EF; dos Santos, SB; Thiengo, SC	Fernandez, Monica Ammon; de Mattos, Aline Carvalho; da Silva, Elizangela Feitosa; dos Santos, Sonia Barbosa; Thiengo, Silvana Carvalho	A malacological survey in the Manso Power Plant, State of Mato Grosso, Brazil: new records of freshwater snails, including transmitters of schistosomiasis and exotic species	REVISTA DA SOCIEDADE BRASILEIRA DE MEDICINA TROPICAL	REV SOC BRAS MED TRO		10.1590/0037-8682-0138-2014	http://dx.doi.org/10.1590/0037-8682-0138-2014	Antillorbis nordestensis; Burnupia ingae; Biomphalaria straminea; Biomphalaria amazonica; Melanoides tuberculata; Corbicula fluminea; Corbicula largillierti	Gastropod; Gastropod; Gastropod; Gastropod; Gastropod; Bivalve; Bivalve	Brasil	Parasitology	2014
Ragonha, FH; Pinha, GD; Petsch, DK; Mansur, MCD; Takeda, AM	Ragonha, Flavio Henrique; Pinha, Gisele Daiane; Petsch, Danielle Katharine; Dreher Mansur, Maria Cristina; Takeda, Alice Michiyo	First records of Freshwater Bivalves of Ilha Grande National Park, Parana, Brazil	IHERINGIA SERIE ZOOLOGIA	IHERINGIA SER ZOOL		10.1590/1678-4766201410411420	http://dx.doi.org/10.1590/1678-4766201410411420	Pisidium; Diplodon sp; Corbicula fluminea	Bivalve; Bivalve; Bivalve	Brasil	Conservation	2014
de Sá, RL; Santin, L; do Amaral, AMB; Martello, AR; Kotzian, CB	de Sa, Roger Lopes; Santin, Luciani; Blank do Amaral, Aline Monique; Martello, Alcemar Rodrigues; Kotzian, Carla Bender	Diversity of mollusks in streams of a montane region in southern Brazil	BIOTA NEOTROPICA	BIOTA NEOTROP		10.1590/S1676-06032013000300024	http://dx.doi.org/10.1590/S1676-06032013000300024	Corbicula fluminea; Uncancylus concentricus; Potamolithus catharinae; Hebetancylus moricandi; Potamolithus ribeirensis; Heleobia bertoniana; Biomphalaria straminea; Biomphalaria tenagophila; Lymnaea columella; Eupera klappenbachi; Eupera elliptica; Asolene spixii; Pisidium sterkianum; Pisidium punctiferum; Pomacea canaliculata; Pomella americanista; Diplodon rhuacoicus; Anodontites tenebricosus	Bivalve; Gastropod; Gastropod; Gastropod; Gastropod; Gastropod; Gastropod; Gastropod; Gastropod; Gastropod; Gastropod; Gastropod; Gastropod; Gastropod; Gastropod; Gastropod; Gastropod; Gastropod; Gastropod	Brasil	Conservation	2013
Silva, PP; Peso-Aguiar, MC; Ribeiro, G	Silva, Patricia P.; Peso-Aguiar, Marlene C.; Ribeiro, Gabriel	Gametogenic cycle and reproductive behavior of Iphigenia brasiliana (Mollusca, Bivalvia, Donacidae) in the Subae river estuary, Todos os Santos Bay, Bahia, Brazil	IHERINGIA SERIE ZOOLOGIA	IHERINGIA SER ZOOL		10.1590/S0073-47212012005000011	http://dx.doi.org/10.1590/S0073-47212012005000011	Iphigenia brasiliana	Bivalve	Brasil	Physiology	2012
Karatayev, AY; Miller, TD; Burlakova, LE	Karatayev, Alexander Y.; Miller, Thomas D.; Burlakova, Lyubov E.	Long-term changes in unionid assemblages in the Rio Grande, one of the World's top 10 rivers at risk	AQUATIC CONSERVATION-MARINE AND FRESHWATER ECOSYSTEMS	AQUAT CONSERV		10.1002/aqc.2226	http://dx.doi.org/10.1002/aqc.2226	Truncilla cognata; Potamilis metnecktayi; Popenaias popeii; Quadrula couchiana; Q. couchiana; Quincuncina mitchelli	Bivalve; Bivalve; Bivalve; Bivalve; Bivalve; Bivalve; Bivalve	Brasil	Conservation	2012
Erthal, F; Kotzian, CB; Simoes, MG	Erthal, Fernando; Kotzian, Carla B.; Simoes, Marcello G.	FIDELITY OF MOLLUSCAN ASSEMBLAGES FROM THE TOURO PASSO FORMATION (PLEISTOCENE-HOLOCENE), SOUTHERN BRAZIL: TAPHONOMY AS A TOOL FOR DISCOVERING NATURAL BASELINES FOR FRESHWATER COMMUNITIES	PALAIOS	PALAIOS		10.2110/palo.2010.p10-145r	http://dx.doi.org/10.2110/palo.2010.p10-145r	Cyanocyclas limosa; Corbicula fluminea; Heleobia bertoniana	Bivalve; Bivalve; Gastropod	Brasil	Paleontology	2011
Jacomini, AE; de Camargo, PB; Avelar, WEP; Bonato, PS	Jacomini, Analu Egydio; de Camargo, Plinio Barbosa; Paiva Avelar, Wagner Eustaquio; Bonato, Pierina Sueli	Assessment of Ametryn Contamination in River Water, River Sediment, and Mollusk Bivalves in Sao Paulo State, Brazil	ARCHIVES OF ENVIRONMENTAL CONTAMINATION AND TOXICOLOGY	ARCH ENVIRON CON TOX		10.1007/s00244-010-9552-z	http://dx.doi.org/10.1007/s00244-010-9552-z	Corbicula fluminea; Diplodon fontaineanus	Bivalve; Bivalve	Brasil	Conservation	2011
Maltchik, L; Stenert, C; Kotzian, CB; Pereira, D	Maltchik, L.; Stenert, C.; Kotzian, C. B.; Pereira, D.	Responses of freshwater molluscs to environmental factors in Southern Brazil wetlands	BRAZILIAN JOURNAL OF BIOLOGY	BRAZ J BIOL		10.1590/S1519-69842010005000003	http://dx.doi.org/10.1590/S1519-69842010005000003	Pomacea canaliculata; Biomphalaria tenagophila, Lymnaea columella; Omalonyx convexus; Eupera klappenbachi; Musculium sp; Heleobia sp		Brasil	Ecology	2010
Oliveira, MD; Hamilton, SK; Calheiros, DF; Jacobi, CM	Oliveira, Marcia D.; Hamilton, Stephen K.; Calheiros, Debora F.; Jacobi, Claudia M.	Oxygen Depletion Events Control the Invasive Golden Mussel (Limnoperna fortunei) in a Tropical Floodplain	WETLANDS	WETLANDS		10.1007/s13157-010-0081-3	http://dx.doi.org/10.1007/s13157-010-0081-3	Limnoperna fortunei	Bivalve	Brasil	Physiology	2010
Oliveira, MD; Hamilton, SK; Jacobi, CM	Oliveira, Marcia D.; Hamilton, Stephen K.; Jacobi, Claudia M.	Forecasting the expansion of the invasive golden mussel Limnoperna fortunei in Brazilian and North American rivers based on its occurrence in the Paraguay River and Pantanal wetland of Brazil	AQUATIC INVASIONS	AQUAT INVASIONS		10.3391/ai.2010.5.1.8	http://dx.doi.org/10.3391/ai.2010.5.1.8	Limnoperna fortunei	Bivalve	Brasil	Conservation	2010
Guimaraes, RJPS; Freitas, CC; Dutra, LV; Felgueiras, CA; Moura, ACM; Amaral, RS; Drummond, SC; Scholte, RGC; Oliveira, G; Carvalho, OS	Guimaraes, Ricardo J. P. S.; Freitas, Corina C.; Dutra, Luciano V.; Felgueiras, Carlos A.; Moura, Ana C. M.; Amaral, Ronaldo S.; Drummond, Sandra C.; Scholte, Ronaldo G. C.; Oliveira, Guilherme; Carvalho, Omar S.	Spatial distribution of Biomphalaria mollusks at Sao Francisco River Basin, Minas Gerais, Brazil, using geostatistical procedures	ACTA TROPICA	ACTA TROP		10.1016/j.actatropica.2008.10.012	http://dx.doi.org/10.1016/j.actatropica.2008.10.012	Biomphalaria straminea; Biompharia glabrata; Biomphalaria tenagophila	Gastropod; Gastropod; Gastropod	Brasil	Conservation	2009
Pareschi, DC; Matsumura-Tundisi, T; Medeiros, GR; Luzia, AP; Tundisi, JG	Pareschi, D. C.; Matsumura-Tundisi, T.; Medeiros, G. R.; Luzia, A. P.; Tundisi, J. G.	First occurrence of Limnoperna fortunei (Dunker, 1857) in the Rio Tiete watershed (Sao Paulo State, Brazil)	BRAZILIAN JOURNAL OF BIOLOGY	BRAZ J BIOL		10.1590/S1519-69842008000500017	http://dx.doi.org/10.1590/S1519-69842008000500017	Limnoperna fortunei	Bivalve	Brasil	Ecology	2008
Felipi, PG; Silva-Souza, AT	Felipi, Paula Guardia; Silva-Souza, Angela Teresa	Anodontites trapesialis (LAMARCK, 1819): a bivalve parasite of freshwater fishes	SEMINA-CIENCIAS AGRARIAS	SEMIN-CIENC AGRAR		10.5433/1679-0359.2008v29n4p895	https://doi.org/10.5433/1679-0359.2008v29n4p895	Anodontites trapesialis	Bivalve	Brasil	Parasitology	2008
Pestana, D; Pie, MR; Ostrensky, A; Boeger, WA; Andreoli, C; Franceschi, F; Lagos, P	Pestana, Debora; Pie, Marcio Roberto; Ostrensky, Antonio; Boeger, Walter Antonio; Andreoli, Cleverson; Franceschi, Francisco; Lagos, Patricia	Seasonal variation in larval density of Limnoperna fortunei (Bivalvia, Mytilidae) in the Iguacu and Parana rivers, in the region of Foz do Iguacu, Parana, southern Brazil	BRAZILIAN ARCHIVES OF BIOLOGY AND TECHNOLOGY	BRAZ ARCH BIOL TECHN		10.1590/S1516-89132008000300023	http://dx.doi.org/10.1590/S1516-89132008000300023	Limnoperna fortunei	Bivalve	Brasil	Conservation	2008
Angonesi, LG; da Rosa, NG; Berrivenuti, CE	Angonesi, Luciana G.; da Rosa, Natalia G.; Berrivenuti, Carlos E.	Tolerance to salinities shocks of the invasive mussel Limnoperma fortunei under experimental conditions	IHERINGIA SERIE ZOOLOGIA	IHERINGIA SER ZOOL		10.1590/S0073-47212008000100009	http://dx.doi.org/10.1590/S0073-47212008000100009	Limnoperna fortunei	Bivalve	Brasil	Ecology	2008
Sousa, R; Antunes, C; Guilhermino, L	Sousa, R.; Antunes, C.; Guilhermino, L.	Ecology of the invasive Asian clam Corbicula fluminea (Muller, 1774) in aquatic ecosystems:: an overview	ANNALES DE LIMNOLOGIE-INTERNATIONAL JOURNAL OF LIMNOLOGY	ANN LIMNOL-INT J LIM		10.1051/limn:2008017	http://dx.doi.org/10.1051/limn:2008017	Corbicula fluminea	Bivalve	Brasil	Ecology	2008
Callil, CT; Mansur, MCD	Callil, Claudia T.; Mansur, Maria C. D.	Gametogenesis and dynamics of the reproduction of Anodontites trapesialis (Lamarck) (Unionoida, Mycetopodidae) from baia do polo lake at the cuiaba river wetland, mato grosso, Brazil	REVISTA BRASILEIRA DE ZOOLOGIA	REV BRAS ZOOL		10.1590/S0101-81752007000300033	http://dx.doi.org/10.1590/S0101-81752007000300033	Anodontites trapesialis	Bivalve	Brasil	Physiology	2007
Villela, IV; de Oliveira, IM; Silveira, JC; Dias, JF; Henriques, JAP; da Silva, J	Villela, Izabel Vianna; de Oliveira, Iuri Marques; Silveira, Juliano Coelho; Dias, Johnny Ferraz; Pegas Henriques, Joao Antonio; da Silva, Juliana	Assessment of environmental stress by the micronucleus and comet assays on Limnoperna fortunei exposed to Guaiba hydrographic region samples (Brazil) under laboratory conditions	MUTATION RESEARCH-GENETIC TOXICOLOGY AND ENVIRONMENTAL MUTAGENESIS	MUTAT RES-GEN TOX EN		10.1016/j.mrgentox.2006.12.001	http://dx.doi.org/10.1016/j.mrgentox.2006.12.001	Limnoperna fortunei	Bivalve	Brasil	Ecology	2007
Mansur, MCD; Pereira, D	Mansur, Maria C. D.; Pereira, Daniel	Limnic bivalves of the Sinos river basin, Rio Grande do Sul, Brazil (Bivalvia, Unionoida, Veneroida And Mytiloida).	REVISTA BRASILEIRA DE ZOOLOGIA	REV BRAS ZOOL		10.1590/S0101-81752006000400021	http://dx.doi.org/10.1590/S0101-81752006000400021	Diplodon berthae; Diplodon granosus multistriatus; Diplodon martensi; Diplodon pilsbryi; Diplodon hildae; Diplodon (Rhipidodonta) koseritzi; Diplodon (Rhipidodonta) charruanus; Diplodon (Rhipidodonta) deceptus; Castalia martensi; Monocondylaea minuana; Monocondylaea corrientesensis; Anodontites patagonicus; Anodontites trapezeus; Anodontites lucidus; Anodontites iheringi; Anodontites tenebricosus…	Bivalve; Bivalve; Bivalve; Bivalve; Bivalve; Bivalve; Bivalve; Bivalve; Bivalve; Bivalve; Bivalve; Bivalve; Bivalve; Bivalve; Bivalve; Bivalve; Bivalve; Bivalve; Bivalve; Bivalve; Bivalve; Bivalve; Bivalve; Bivalve; Bivalve; Bivalve	Brasil	Taxonomy	2006
de Oliveira, MD; Takeda, AM; de Barros, LF; Barbosa, DS; de Resende, EK	de Oliveira, MD; Takeda, AM; de Barros, LF; Barbosa, DS; de Resende, EK	Invasion by Limnoperna fortunei (Dunker, 1857) (Bivalvia, Mytilidae) of the Pantanal wetland, Brazil	BIOLOGICAL INVASIONS	BIOL INVASIONS		10.1007/s10530-005-0331-0	http://dx.doi.org/10.1007/s10530-005-0331-0	Limnoperna fortunei	Bivalve	Brasil	Conservation	2006
Villavicencio, A; de Vasconcellos, MC	Villavicencio, A; de Vasconcellos, MC	First report of Lymnaea cousini Jousseaume, 1887 naturally infected with Fasciola hepatica (Linnaeus, 1758) (Trematoda: Digenea) in Machachi, Ecuador	MEMORIAS DO INSTITUTO OSWALDO CRUZ	MEM I OSWALDO CRUZ		10.1590/S0074-02762005000700010	http://dx.doi.org/10.1590/S0074-02762005000700010	Limnea cousini	Gastropod	Brasil	Parasitology	2005
Giovanelli, A; da Silva, CLPAC; Leal, GBE; Baptista, DF	Giovanelli, A; da Silva, CLPAC; Leal, GBE; Baptista, DF	Habitat preference of freshwater snails in relation to environmental factors and the presence of the competitor snail Melanoides tuberculatus (Muller, 1774)	MEMORIAS DO INSTITUTO OSWALDO CRUZ	MEM I OSWALDO CRUZ		10.1590/S0074-02762005000200010	http://dx.doi.org/10.1590/S0074-02762005000200010	Physa marmorata; Melanoides tuberculatus; Biomphalaria tenagophila	Gastropod; Gastropod; Gastropod	Brasil	Ecology	2005
Guimaraes, CT; de Souza, CP; Soares, DD	Guimaraes, CT; de Souza, CP; Soares, DD	Possible competitive displacement of planorbids by Melanoides tuberculata in Minas Gerais, Brazil	MEMORIAS DO INSTITUTO OSWALDO CRUZ	MEM I OSWALDO CRUZ		10.1590/S0074-02762001000900027	http://dx.doi.org/10.1590/S0074-02762001000900027	Melanoides tuberculata	Gastropod	Brasil	Conservation	2001
DEFREITAS, JR; DOSSANTOS, MBL	DEFREITAS, JR; DOSSANTOS, MBL	CURRENT ADVANCES ON THE STUDY OF SNAIL-SNAIL INTERACTIONS, WITH SPECIAL EMPHASIS ON COMPETITION PROCESS	MEMORIAS DO INSTITUTO OSWALDO CRUZ	MEM I OSWALDO CRUZ		10.1590/S0074-02761995000200024	http://dx.doi.org/10.1590/S0074-02761995000200024	Pomacea haustrum, Biomphalaria glabrata, Biomphalaria tenagophila, Biomphalaria straminea; Melanoides tuberculata	Gastropod; Gastropod; Gastropod; Gastropod; Gastropod	Brasil	Conservation	1995
Ludwig, S; Darrigran, G; Boeger, WA	Ludwig, Sandra; Darrigran, Gustavo; Boeger, Walter A.	Opening the black box of the invasion of Corbicula clams (Bivalvia, Corbiculidae) in South America: a genetic and morphological evaluation	HYDROBIOLOGIA	HYDROBIOLOGIA	Lotic	10.1007/s10750-023-05378-1	http://dx.doi.org/10.1007/s10750-023-05378-1	Corbicula spp.	Bivalve	Brasil; Argentina; Colombia	Genetics; Evolution	2023
Geda, SR; Lujan, NK; Perkins, M; Abernethy, E; Sabaj, MH; Gangloff, M	Geda, Susan; Lujan, Nathan; Perkins, Michael; Abernethy, Erin; Sabaj, Mark; Gangloff, Michael	Multilocus phylogeny of the zebra mussel family Dreissenidae (Mollusca: Bivalvia) reveals a fourth Neotropical genus sister to all other genera	MOLECULAR PHYLOGENETICS AND EVOLUTION	MOL PHYLOGENET EVOL	-	10.1016/j.ympev.2018.07.009	http://dx.doi.org/10.1016/j.ympev.2018.07.009	Congeria spp.; Mytilopsis spp.; Dreissena spp.; Rheodresissena spp. Rheodreissena	Bivalve	Brasil; Venezuela	Evolution	2018
Collado, GA; Valladares, MA; Suárez, C; Seguel, M; Cabello-Guzmán, G	Collado, Gonzalo A.; Valladares, Moises A.; Suarez, Cristian; Seguel, Mathias; Cabello-Guzman, Gerardo	Shape, Microstructure, and Chemical Composition of Pearls from the Freshwater Clam Diplodon chilensis Native to South America	ANIMALS	ANIMALS-BASEL	-	10.3390/ani13132231	http://dx.doi.org/10.3390/ani13132231	Diplodon chilensis	Bivalve	Chile	Taxonomy	2023
Barrios-Figueroa, R; Urbina, MA	Barrios-Figueroa, R.; Urbina, M. A.	Behavioural and physiological responses to salinization and air exposure during the ontogeny of a freshwater South American snail	CONSERVATION PHYSIOLOGY	CONSERV PHYSIOL	-	10.1093/conphys/coac089	http://dx.doi.org/10.1093/conphys/coac089	Chilina dombeiana	Gastropod	Chile	Physiology	2023
Collado, GA; Vidal, MA; Torres-Díaz, C	Collado, G. A.; Vidal, M. A.; Torres-Diaz, C.	Spatial distribution of two invasive freshwater snails and environmental correlates of the mollusc community abundance, a case study in Chile	ANIMAL BIODIVERSITY AND CONSERVATION	ANIM BIODIV CONSERV	-	10.32800/abc.2023.46.0187	http://dx.doi.org/10.32800/abc.2023.46.0187	Physa acuta; Potamopyrgus antipodarum	Gastropod; Gastropod	Chile	Ecology	2023
Valladares, MA; Fabres, AA; Collado, GA; Saez, PA; Mendez, MA	Valladares, Moises A.; Fabres, Alejandra A.; Collado, Gonzalo A.; Saez, Paola A.; Mendez, Marco A.	Coping With Dynamism: Phylogenetics and Phylogeographic Analyses Reveal Cryptic Diversity in Heleobia Snails of Atacama Saltpan, Chile	FRONTIERS IN ECOLOGY AND EVOLUTION	FRONT ECOL EVOL	Lotic	10.3389/fevo.2022.869626	http://dx.doi.org/10.3389/fevo.2022.869626	Heleobia spp.	Gastropod	Chile	Genetics; Conservation	2022
Bórquez, J; Valdovinos, C; Brante, A	Borquez, Jessica; Valdovinos, Claudio; Brante, Antonio	Genetic structure and diversity in the freshwater gastropod Chilina dombeiana in the Biobio River, Chile	CONSERVATION GENETICS	CONSERV GENET	-	10.1007/s10592-020-01308-z	http://dx.doi.org/10.1007/s10592-020-01308-z	Chilina dombeiana	Gastropod	Chile	Genetics	2020
Collado, GA; Vidal, MA; Torres-Díaz, C; Cabrera, FJ; Araya, JF; Darrigran, G	Collado, Gonzalo A.; Vidal, Marcela A.; Torres-Diaz, Cristian; Cabrera, Francisco J.; Araya, Juan F.; Darrigran, Gustavo	Morphological and molecular identification of the invasive freshwater snail Physa acuta (Gastropoda: Physidae) into Llanquihue Lake, Chilean Patagonia	ANAIS DA ACADEMIA BRASILEIRA DE CIENCIAS	AN ACAD BRAS CIENC	Lentic	10.1590/0001-3765202020181101	http://dx.doi.org/10.1590/0001-3765202020181101	Physa acuta	Gastropod	Chile	Genetics; Morphology	2020
Bórquez, J; Brante, A	Borquez, Jessica; Brante, Antonio	Paternity Outcomes in the Freshwater Gastropod, Chilina dombeiana in the Biobio River, Chile	PLOS ONE	PLOS ONE	Lotic	10.1371/journal.pone.0169574	http://dx.doi.org/10.1371/journal.pone.0169574	Chilina dombeiana	Gastropod	Chile	Genetics	2017
Collado, GA	Collado, Gonzalo A.	Out of New Zealand: molecular identification of the highly invasive freshwater mollusk Potamopyrgus antipodarum (Gray, 1843) in South America	ZOOLOGICAL STUDIES	ZOOL STUD		10.1186/s40555-014-0070-y	http://dx.doi.org/10.1186/s40555-014-0070-y	Potamopyrgus antipodarum	Gastropod	Chile	Conservation	2014
Risk, MJ; Burchell, M; de Roo, K; Nairn, R; Tubrett, M; Forsterra, G	Risk, Michael J.; Burchell, Meghan; de Roo, Katharina; Nairn, Rob; Tubrett, Mike; Forsterra, Gunter	Trace elements in bivalve shells from the Rio Cruces, Chile	AQUATIC BIOLOGY	AQUAT BIOL		10.3354/ab00268	http://dx.doi.org/10.3354/ab00268	Diplodon chilensis	Bivalve	Chile	Ecology	2010
Parada, E; Peredo, S; Jara-Seguel, P	Parada, Esperanza; Peredo, Santiago; Jara-Seguel, Pedro	PRESENT RECORD OF SPECIES OF MUSCULIUM LINK, 1807 (BIVALVIA: SPHAERIIDAE) IN CHILE WITH NOTES ON ITS MORPHOLOGY AND BIOMETRY OF ITS POPULATIONS	GAYANA	GAYANA		10.4067/S0717-65382009000100008	http://dx.doi.org/10.4067/S0717-65382009000100008	Musculium argentinum; Musculium patagonicum	Bivalve; Bivalve	Chile	Taxonomy	2009
Valdovinos, C; Pedreros, P	Valdovinos, Claudio; Pedreros, Pablo	Geographic variations in shell growth rates of the mussel Diplodon chilensis from temperate lakes of Chile:: Implications for biodiversity conservation	LIMNOLOGICA	LIMNOLOGICA		10.1016/j.limno.2006.08.007	http://dx.doi.org/10.1016/j.limno.2006.08.007	Diplodon chilensis	Bivalve	Chile	Conservation	2007
Quijón, P; Contreras, H; Jaramillo, E	Quijón, P; Contreras, H; Jaramillo, E	Population biology of the intertidal snail Chilina ovalis Sowerby (Pulmonata) in the Queule River estuary, south-central Chile	ESTUARIES	ESTUARIES		10.2307/1352814	http://dx.doi.org/10.2307/1352814	Chilina ovalis	Gastropod	Chile	Ecology	2001
Wolff, C; Albrecht, C; Wilke, T	Wolff, Christian; Albrecht, Christian; Wilke, Thomas	Recovery from interglacial-related bottleneck likely triggered diversification of Lake Titicaca gastropod species flock	JOURNAL OF GREAT LAKES RESEARCH	J GREAT LAKES RES	Lentic	10.1016/j.jglr.2019.08.006	http://dx.doi.org/10.1016/j.jglr.2019.08.006	Heleobia spp.	Gastropod	Chile; Perú; Bolivia	Evolution; Genetics	2020
Perera, AAV; Noda, JS; Jiménez, YH	Vazquez Perera, Antonio Alejandro; Sanchez Noda, Jorge; Hevia Jimenez, Yosvania	Distribution and habitat preferences of the genus Biomphalaria (Gastropoda: Planorbidae) in Cuba	MEMORIAS DO INSTITUTO OSWALDO CRUZ	MEM I OSWALDO CRUZ		10.1590/S0074-02762010000100005	http://dx.doi.org/10.1590/S0074-02762010000100005	Biomphalaria havanensis; Biomphalaria helophila; Biomphalaria pallida	Gastropod; Gastropod; Gastropod	Cuba	Taxonomy	2010
Cadena, EA; Casado-Ferrer, I	Cadena, Edwin-Alberto; Casado-Ferrer, Ismael	Late Miocene freshwater mussels from the intermontane Chota Basin, northern Ecuadorean Andes	JOURNAL OF SOUTH AMERICAN EARTH SCIENCES	J S AM EARTH SCI	Lentic	10.1016/j.jsames.2018.10.012	http://dx.doi.org/10.1016/j.jsames.2018.10.012	Anodontites sp.	Bivalve	Ecuador	Paleontology	2019
COVICH, A	COVICH, A	RECENT CHANGES IN MOLLUSCAN SPECIES-DIVERSITY OF A LARGE TROPICAL LAKE (LAGO-DE-PETEN, GUATEMALA)	LIMNOLOGY AND OCEANOGRAPHY	LIMNOL OCEANOGR		10.4319/lo.1976.21.1.0051	http://dx.doi.org/10.4319/lo.1976.21.1.0051	Pyrgophorus coronatus, Biomphalaria havanensis, and Stenophysa spiculata	Gastropod; Gastropod; Gastropod	Guatemala	Conservation	1976
Peralta-García, A; Valdez-Villavicencio, JH; Navarro-Tiznado, A; Erickson, RA; Resendiz, RAL	Peralta-Garcia, Anny; Valdez-Villavicencio, Jorge H.; Navarro-Tiznado, Andrea; Erickson, Richard A.; Resendiz, Rafael A. Lara	An update on the freshwater exotic fauna in the Mediterranean region of Baja California, Mexico	BIOINVASIONS RECORDS	BIOINVASIONS REC	Both	10.3391/bir.2023.12.4.17	http://dx.doi.org/10.3391/bir.2023.12.4.17	Corbicula fluminea; Dreissena bugensis; Melanoides tuberculata	Bivalve; Bivalve; Gastropod	México	Conservation	2023
Kiser, AH; Cummings, KS; Tiemann, JS; Smith, CH; Johnson, NA; Lopez, RR; Randklev, CR	Kiser, Alexander H.; Cummings, Kevin S.; Tiemann, Jeremy S.; Smith, Chase H.; Johnson, Nathan A.; Lopez, Roel R.; Randklev, Charles R.	Using a multi-model ensemble approach to determine biodiversity hotspots with limited occurrence data in understudied areas: An example using freshwater mussels in Mexico	ECOLOGY AND EVOLUTION	ECOL EVOL	-	10.1002/ece3.8909	http://dx.doi.org/10.1002/ece3.8909	Anodontites cylindracea; Megalonaias nickliniana; Psoronaias semigranosa; Popenaias semirasa; Popenaias berezai; Nephronaias aztecorum; Friersonia iridella; Cyrtonaias tampicoensis; Disconaias fimbriata; Disconaias disca; Actinonaias signata; Actinonaias medellina; Actinonaias coyensis; Utterbackia imbecillis; Anodonta impura	Bivalve; Bivalve; Bivalve; Bivalve; Bivalve; Bivalve; Bivalve; Bivalve; Bivalve; Bivalve; Bivalve; Bivalve; Bivalve; Bivalve; Bivalve	México	Ecology	2022
Czaja, A; Becerra-López, JL; Estrada-Rodríguez, JL; Romero-Méndez, U; Cardoza-Martínez, GF; Sáenz-Mata, J; Estrada-Arellano, JR; Garza-Martínez, MA; Hernández-Terán, F; Cerano-Paredes, J	Czaja, Alexander; Luis Becerra-Lopez, Jorge; Luis Estrada-Rodriguez, Jose; Romero-Mendez, Ulises; Fernando Cardoza-Martinez, Gabriel; Saenz-Mata, Jorge; Raymundo Estrada-Arellano, Josue; Angel Garza-Martinez, Miguel; Hernandez-Teran, Fernando; Cerano-Paredes, Julian	The Sabinas River basin in Coahuila, a new hotspot of molluscan biodiversity near Cuatro Cienegas, Chihuahuan Desert, northern Mexico	REVISTA MEXICANA DE BIODIVERSIDAD	REV MEX BIODIVERS	Lotic	10.22201/ib.20078706e.2022.93.3588	http://dx.doi.org/10.22201/ib.20078706e.2022.93.3588	Corbicula fluminea; Pisidium nitidum; Euglesa compressa; Eupera cubensis; Melanoides tuberculata; Phreatomascogos gregoi; Balconorbis sabinasensis; Coahuilix parrasense; Cochliopina riograndensis; Juturnia coahuilae; Mexithauma cf. quadripaludium; Pyrgophorus parvulus; Lyogyrus sp.; Cincinnatia integra; Galba sp.; Physella acuta; Biomphalaria havenensis; Gyraulus parvus; Hebentancylus excentricus…	Bivalve; Bivalve; Bivalve; Bivalve; Gastropod; Gastropod; Gastropod; Gastropod; Gastropod; Gastropod; Gastropod; Gastropod; Gastropod; Gastropod; Gastropod; Gastropod; Gastropod; Gastropod; Gastropod; Gastropod; Gastropod; Gastropod; Gastropod	México	Conservation; Taxonomy	2022
Czaja, A; Cardoza-Martínez, GF; Meza-Sánchez, IG; Estrada-Rodríguez, JL; Saenz-Mata, J; Becerra-López, JL; Romero-Méndez, U; Estrada-Arellano, JR; Garza-Martínez, MA; Paulín, JAD	Czaja, Alexander; Fernando Cardoza-Martinez, Gabriel; Gabriela Meza-Sanchez, Iris; Luis Estrada-Rodriguez, Jose; Saenz-Mata, Jorge; Luis Becerra-Lopez, Jorge; Romero-Mendez, Ulises; Raymundo Estrada-Arellano, Josue; Angel Garza-Martinez, Miguel; Davila Paulin, Jose Antonio	New genus, two new species and new records of subterranean freshwater snails (Caenogastropoda; Cochliopidae and Lithoglyphidae) from Coahuila and Durango, Northern Mexico	SUBTERRANEAN BIOLOGY	SUBTERR BIOL	Lotic	10.3897/subtbiol.29.34123	http://dx.doi.org/10.3897/subtbiol.29.34123	Phreatomascogos gregoi; Balconorbis uvaldensis; Coahuilix parrasense	Gastropod; Gastropod; Gastropod	México	Taxonomy, Morphology	2019
Czaja, A; Estrada-Rodríguez, JL; Romero-Méndez, U; Estrada-Arellano, JR; González-Zamora, A	Czaja, Alexander; Luis Estrada-Rodriguez, Jose; Romero-Mendez, Ulises; Raymundo Estrada-Arellano, Josue; Gonzalez-Zamora, Alberto	First record of fossil gastropod Cincinnatia (Hydrobiidae: Nymphophilinae) in Mexico	REVISTA MEXICANA DE BIODIVERSIDAD	REV MEX BIODIVERS	-	10.1016/j.rmb.2017.10.025	http://dx.doi.org/10.1016/j.rmb.2017.10.025	Cincinnatia integra	Gastropod	México	Paleontology; Taxonomy	2017
Barba-Macías, E; Trinidad-Ocaña, C	Barba-Macias, Everardo; Trinidad-Ocana, Cinthia	New records of the exotic Asian clam Corbicula fluminea (Bivalvia: Veneroida: Cyrenidae) in wetlands of Papaloapan, Grijalva and Usumacinta basins	REVISTA MEXICANA DE BIODIVERSIDAD	REV MEX BIODIVERS	Lentic	10.1016/j.rmb.2016.10.021	http://dx.doi.org/10.1016/j.rmb.2016.10.021	Corbicula fluminea	Bivalve	México	Conservation	2017
Czaja, A; Estrada-Rodríguez, JL; Romero-Méndez, U; Orona-Espino, A	Czaja, Alexander; Estrada-Rodriguez, Jose Luis; Romero-Mendez, Ulises; Orona-Espino, Anselmo	Two new subfossil species of springsnails (Hydrobiidae: Pyrgulopsis) from North Mexico and their relation with extant species from Cuatrocienegas	BOLETIN DE LA SOCIEDAD GEOLOGICA MEXICANA	B SOC GEOL MEX	-	10.18268/BSGM2017v69n1a9	http://dx.doi.org/10.18268/BSGM2017v69n1a9	Pyrgulopsis paleominckleyi; Pyrgulopsis paleoacarinatus	Gastropod; Gastropod	México	Taxonomy; Paleontology	2017
Trinidad-Ocaña, C; Miranda-Vidal, JF; Juárez-Flores, J; Barba-Macías, E	Trinidad-Ocana, Cinthia; Miranda-Vidal, Jose F.; Juarez-Flores, Juan; Barba-Macias, Everardo	Distribution and density of invasive mollusks of the Thiaridae family in freshwater environments of Tabasco, Mexico	HIDROBIOLOGICA	HIDROBIOLOGICA	Both	10.24275/uam/izt/dcbs/hidro/2017v27n1/Barba	http://dx.doi.org/10.24275/uam/izt/dcbi/hidro/2017v27n1/Barba	Melanoides tuberculata; Tarebia granifera	Gastropod; Gastropod	México	Conservation	2017
Oliva-Rivera, JJ; Ocaña, FA; de Jesús-Navarrete, A; de Jesús-Carrillo, RM; Vargas-Espósitos, AA	Oliva-Rivera, Jose J.; Ocana, Frank A.; de Jesus-Navarrete, Alberto; de Jesus-Carrillo, Rosa M.; Vargas-Espositos, Abel A.	Reproductive aspects of Pomacea flagellata (Mollusca: Ampullariidae) at Bacalar lagoon, Quintana Roo, Mexico	REVISTA DE BIOLOGIA TROPICAL	REV BIOL TROP	Lentic	10.15517/rbt.v64i4.22871	https://doi.org/10.15517/rbt.v64i4.22871	Pomacea flagellata	Gastropod	México	Ecology	2016
Rubio, F; Rolán, E; Worsaae, K; Martínez, A; Gonzalez, BC	Rubio, Federico; Rolan, Emilio; Worsaae, Katrine; Martinez, Alejandro; Gonzalez, Brett C.	Description of the first anchialine gastropod from a Yucatan cenote, Teinostoma brankovitsi n. sp (Caenogastropoda: Tornidae), including an emended generic diagnosis	JOURNAL OF MOLLUSCAN STUDIES	J MOLLUS STUD	-	10.1093/mollus/eyv049	http://dx.doi.org/10.1093/mollus/eyv049	Teinostoma brankovitsi	Gastropod	México	Taxonomy	2016
Czaja, A; Estrada-Rodríguez, JL; Romero-Méndez, U	Czaja, Alexander; Luis Estrada-Rodriguez, Jose; Romero-Mendez, Ulises	A new species of the genus Mexipyrgus Taylor, 1966 (Caenogastropoda: Truncatelloidea: Cochliopidae) from late Holocene spring deposits in Viesca, Coahuila, Mexico	NAUTILUS	NAUTILUS	Lentic			Mexipyrgus viescaensis	Gastropod	México	Paleontology	2015
Inoue, K; Lang, BK; Berg, DJ	Inoue, Kentaro; Lang, Brian K.; Berg, David J.	Past climate change drives current genetic structure of an endangered freshwater mussel species	MOLECULAR ECOLOGY	MOL ECOL	-	10.1111/mec.13156	http://dx.doi.org/10.1111/mec.13156	Popenaias popeii	Bivalve	México	Ecology	2015
Wakida-Kusunoki, AT; Wakida, FT; De Leon-Sandoval, JM	Wakida-Kusunoki, Armando T.; Wakida, Fernando T.; Mario De Leon-Sandoval, Jose	First record of quagga mussel Dreissena rostriformis bugensis (Andrusov, 1897) (Bivalvia, Dreissenidae) from Mexico	BIOINVASIONS RECORDS	BIOINVASIONS REC		10.3391/bir.2015.4.1.05	http://dx.doi.org/10.3391/bir.2015.4.1.05	Dreissena rostriformis bugensis	Bivalve	México	Taxonomy	2015
Hernández, SVM; Ruíz, LJR; Aguilar, JG; de la Cruz, JAA; Moreno, JM; Morales, MG; García, SA; López, RMP; Figueroa, CJP; Campillo, LG	Mellado Hernandez, Sujeidy Vianey; Rangel Ruiz, Luis Jose; Gamboa Aguilar, Jaquelina; Arevalo de la Cruz, Juan Armando; Montiel Moreno, Joel; Garcia Morales, Miguelina; Arias Garcia, Silvia; Padron Lopez, Rosa Martha; Pacheco Figueroa, Coral Jazvel; Gama Campillo, Lilia	Freshwater mollusk species richness in the Rio Grijalva-Villahermosa and Rio Tonala, Lagunas del Carmen-Machona Watersheds from Tabasco, Mexico	HIDROBIOLOGICA	HIDROBIOLOGICA				Musculium transversum; Musculium partumelum; Mytilopsis leucophaeat; Brachidontes exustus; Crassostrea virginica; Crassostrea rhizophoras; Boonea impressa; Planorbella dury; Hebetancylus excentricus; Pomacea flagellat; Melanoides tuberculeta; Tarebia granifera; Mayabina polita; Mexinauta impluviata; Pyrgophoru coronatus; Aroapyrgus clenchi; Aphaostracom theicrenetus; Littoridinops tenuipes; Nerit…	Bivalve; Bivalve; Bivalve; Bivalve;Bivalve; Bivalve;Bivalve; Gastropod; Gastropod; Gastropod; Gastropod; Gastropod; Gastropod; Gastropod; Gastropod; Gastropod; Gastropod; Gastropod; Gastropod; Gastropod; Gastropod; Gastropod; Gastropod;	México	Conservation	2015
Inoue, K; Levine, TD; Lang, BK; Berg, DJ	Inoue, Kentaro; Levine, Todd D.; Lang, Brian K.; Berg, David J.	Long-term mark-and-recapture study of a freshwater mussel reveals patterns of habitat use and an association between survival and river discharge	FRESHWATER BIOLOGY	FRESHWATER BIOL		10.1111/fwb.12389	http://dx.doi.org/10.1111/fwb.12389	Popenaias popeii	Bivalve	México	Genetics	2014
Czaja, A; Estrada-Rodríguez, JL; Méndez, UR	Czaja, Alexander; Luis Estrada-Rodriguez, Jose; Romero Mendez, Ulises	Freshwater mollusks of the Valley of Sobaco, Coahuila, Northeastern Mexico - a subfossil ecosystem similar to Cuatrocienegas	BOLETIN DE LA SOCIEDAD GEOLOGICA MEXICANA	BOL SOC GEOL MEX		10.18268/BSGM2014v66n3a4	http://dx.doi.org/10.18268/BSGM2014v66n3a4	Juturnia coahuilae; Pyrgulopsis manantiali; Coahuilix hubbsi; Coahuilix cf. landyei; Assiminea cienegensis; Probythinella protera	Gastropod; Gastropod; Gastropod; Gastropod; Gastropod; Gastropod	México	Taxonomy	2014
Cintra-Buenrostro, CE; Flessa, KW; Dettman, DL	Cintra-Buenrostro, Carlos E.; Flessa, Karl W.; Dettman, David L.	Restoration flows for the Colorado River estuary, Mexico: estimates from oxygen isotopes in the bivalve mollusk Mulinia coloradoensis (Mactridae: Bivalvia)	WETLANDS ECOLOGY AND MANAGEMENT	WETL ECOL MANAG		10.1007/s11273-012-9255-5	http://dx.doi.org/10.1007/s11273-012-9255-5	Mulinia coloradoensis	Bivalve	México	Ecology	2012
Berry, JP; Lind, O	Berry, John P.; Lind, Owen	First evidence of paralytic shellfish toxins and cylindrospermopsin in a Mexican freshwater system, Lago Catemaco, and apparent bioaccumulation of the toxins in tegogolo snails (Pomacea patula catemacensis)	TOXICON	TOXICON		10.1016/j.toxicon.2009.07.035	http://dx.doi.org/10.1016/j.toxicon.2009.07.035	Pomacea patula catemacensis	Gastropod	México	Parasitology	2010
Diupotex-Chong, ME; Cazzaniga, NJ; Uribe-Alcocer, M	Diupotex-Chong, Maria Esther; Cazzaniga, Nestor J.; Uribe-Alcocer, Manuel	Karyological and electrophoretic differences between Pomacea flagellata and P-patula catemacensis (Caenogastropoda: Ampullariidae)	BIOCELL	BIOCELL				Pomacea flagellata; Pomacea patula catemacensi	Gastropod; Gastropod	México	Genetics	2007
Torchin, ME; Hechinger, RF; Huspeni, TC; Whitney, KL; Lafferty, KD	Torchin, ME; Hechinger, RF; Huspeni, TC; Whitney, KL; Lafferty, KD	The introduced ribbed mussel (Geukensia demissa) in Estero de Punta Banda, Mexico:: interactions with the native cord grass, Spartina foliosa	BIOLOGICAL INVASIONS	BIOL INVASIONS		10.1007/s10530-004-5851-5	http://dx.doi.org/10.1007/s10530-004-5851-5	Geukensia demissa	Bivalve	México	Ecology	2005
Hershler, R; Mulvey, M; Liu, HP	Hershler, R; Mulvey, M; Liu, HP	Genetic variation in the Desert Springsnail (Tryonia porrecta):: implications for reproductive mode and dispersal	MOLECULAR ECOLOGY	MOL ECOL		10.1111/j.1365-294X.2005.02522.x	http://dx.doi.org/10.1111/j.1365-294X.2005.02522.x	Tryonia porrecta	Gastropod	México	Genetics	2005
Moline, AB; Shuster, SM; Hendrickson, DA; Marks, JC	Moline, AB; Shuster, SM; Hendrickson, DA; Marks, JC	Genetic variation in a desert aquatic snail (Nymphophilus minckleyi) from Cuatro Cienegas, Coahuila, Mexico	HYDROBIOLOGIA	HYDROBIOLOGIA		10.1023/B:HYDR.0000029972.80491.d3	http://dx.doi.org/10.1023/B:HYDR.0000029972.80491.d3	Nymphophilus minckleyi	Gastropod	México	Genetics	2004
Hershler, R; Liu, HP; Landye, JJ	Hershler, R; Liu, HP; Landye, JJ	A new species of Eremopyrgus (Hydrobiidae: Cochliopinae) from the Chihuahuan Desert, Mexico:: Phylogenetic relationships and biogeography	JOURNAL OF MOLLUSCAN STUDIES	J MOLLUS STUD		10.1093/mollus/68.1.7	http://dx.doi.org/10.1093/mollus/68.1.7	Eremopyrgus elegans	Gastropod	México	Taxonomy	2002
Rodriguez, CA; Flessa, KW; Dettman, DL	Rodriguez, CA; Flessa, KW; Dettman, DL	Effects of upstream diversion of Colorado River water on the estuarine bivalve mollusc Mulinia coloradoensis	CONSERVATION BIOLOGY	CONSERV BIOL		10.1046/j.1523-1739.2001.99463.x	http://dx.doi.org/10.1046/j.1523-1739.2001.99463.x	Mulinia coloradoensis	Gastropod	México	Conservation	2001
HERSHLER, R; MINCKLEY, WL	HERSHLER, R; MINCKLEY, WL	MICROGEOGRAPHIC VARIATION IN THE BANDED SPRING SNAIL (HYDROBIIDAE, MEXIPYRGUS) FROM THE CUATRO-CIENEGAS-BASIN, COAHUILA, MEXICO	MALACOLOGIA	MALACOLOGIA				Mexipyrgus mojarralis; Mexipyrgus churinceanus	Gastropod; Gastropod	México	Genetics	1986
Ramírez, R; Ramirez, JL; Rivera, F; Justino, S; Solís, M; Morin, J; Ampuero, A; Mendivil, A; Congrains, C	Ramirez, Rina; Ramirez, Jorge L.; Rivera, Fatima; Justino, Sandra; Solis, Maria; Morin, Jaime; Ampuero, Andre; Mendivil, Alejandro; Congrains, Carlos	Do not judge a snail by its shell: molecular identification of Pomacea species (Gastropoda: Ampullariidae), with particular reference to the Peruvian Amazonian giant apple snail, erroneously synonymized with Pomacea maculata	ARCHIV FUR MOLLUSKENKUNDE	ARCH MOLLUSKENKD	Lotic	10.1127/arch.moll/151/007-017	http://dx.doi.org/10.1127/arch.moll/151/007-017	Pomacea spp.	Gastropod	Perú	Taxonomy; Genetics	2022
Castro, M; Garreta, C; Arocena, R	Castro, Manuel; Garreta, Celina; Arocena, Rafael	Urban effluents affect the invasive bivalve Limnoperna fortunei (Dunker 1857) fitness in a large Pampasic river (Río Negro, Uruguay)	ENVIRONMENTAL MONITORING AND ASSESSMENT	ENVIRON MONIT ASSESS	Lotic	10.1007/s10661-023-12220-7	http://dx.doi.org/10.1007/s10661-023-12220-7	Limnoperna fortunei	Bivalve	Uruguay	Ecology	2024
César, II; Martín, SM; Rumi, A; Tassara, M	Cesar, I. I.; Martin, S. M.; Rumi, A.; Tassara, M.	Mollusks (Gastropoda and Bivalvia) of the Multiple-Use Reserve Martin Garcia Island, Rio de la Plata River: biodiversity and ecology	BRAZILIAN JOURNAL OF BIOLOGY	BRAZ J BIOL		10.1590/S1519-69842012000100014	http://dx.doi.org/10.1590/S1519-69842012000100014	Biomphalaria tenagophila tenagophila , B. t. guaibensis, B. straminea, B. peregrina, Drepanotrema kermatoides, D. cimex, D. depressissimum, Chilina fluminea, C. rushii, C. megastoma, Uncancylus concentricus, Hebetancylus moricandi, Stenophysa marmorata, Heleobia piscium, H. parchappii, Potamolithus agapetus, P. buschii, P. lapidum, ea canaliculata, P. megastoma, Asolene platae, Corbicula fluminea…	Gastropod; Gastropod; Gastropod; Gastropod; Gastropod; Gastropod; Gastropod; Gastropod; Gastropod; Gastropod; Gastropod; Gastropod; Gastropod; Gastropod; Gastropod; Gastropod; Gastropod; Gastropod; Gastropod; Gastropod; Gastropod; Gastropod; Bivalve; Bivalve; Bivalve; Bivalve; Bivalve;	Uruguay	Taxonomy; Ecology	2012
Brugnoli, E; Clemente, J; Boccardi, L; Borthagaray, A; Scarabino, F	Brugnoli, E; Clemente, J; Boccardi, L; Borthagaray, A; Scarabino, F	Golden mussel Limnoperna fortunei (Bivalvia : Mytilidae) distribution in the main hydrographical basins of Uruguay:: update and predictions	ANAIS DA ACADEMIA BRASILEIRA DE CIENCIAS	AN ACAD BRAS CIENC		10.1590/S0001-37652005000200004	http://dx.doi.org/10.1590/S0001-37652005000200004	Limnoperna fortunei	Bivalve	Uruguay	Conservation	2005
Nava, M; Severeyn, H; Machado, N	Nava, Mario; Severeyn, Hector; Machado, Nakary	Distribution and taxonomy of Pyrgophorus platyrachis (Caenogastropoda: Hydrobiidae) in the Sistema de Maracaibo, Venezuela	REVISTA DE BIOLOGIA TROPICAL	REV BIOL TROP				Pyrgophorus platyrachis	Gastropod	Venezuela	Taxonomy	2011
Wesselingh, FP; Macsotay, O	Wesselingh, FP; Macsotay, O	Pachydon hettneri (Anderson, 1928) as indicator for Caribbean-Amazonian lowland connections during the Early-Middle Miocene	JOURNAL OF SOUTH AMERICAN EARTH SCIENCES	J S AM EARTH SCI		10.1016/j.jsames.2005.07.013	http://dx.doi.org/10.1016/j.jsames.2005.07.013	Pachydon hettneri	Bivalve	Venezuela	Paleontology	2006
Mavárez, J; Pointier, JP; David, P; Delay, B; Jarne, P	Mavárez, J; Pointier, JP; David, P; Delay, B; Jarne, P	Genetic differentiation, dispersal and mating system in the schistosome-transmitting freshwater snail Biomphalaria glabrata	HEREDITY	HEREDITY		10.1038/sj.hdy.6800127	http://dx.doi.org/10.1038/sj.hdy.6800127	Biomphalaria glabrata	Gastropod	Venezuela	Genetics	2002
Mavárez, J; Steiner, C; Pointier, JP; Jarne, P	Mavárez, J; Steiner, C; Pointier, JP; Jarne, P	Evolutionary history and phylogeography of the schistosome-vector freshwater snail Biomphalaria glabrata based on nuclear and mitochondrial DNA sequences	HEREDITY	HEREDITY		10.1038/sj.hdy.6800128	http://dx.doi.org/10.1038/sj.hdy.6800128	Biomphalaria glabrata	Gastropod	Venezuela	Genetics	2002
Mavárez, J; Amarista, M; Pointier, JP; Jarne, P	Mavárez, J; Amarista, M; Pointier, JP; Jarne, P	Fine-scale population structure and dispersal in Biomphalaria glabrata, the intermediate snail host of Schistosoma mansoni, in Venezuela	MOLECULAR ECOLOGY	MOL ECOL		10.1046/j.1365-294X.2002.01486.x	http://dx.doi.org/10.1046/j.1365-294X.2002.01486.x	Biomphalaria glabrata	Gastropod	Venezuela	Parasitology	2002

## Sheet: S2
Supplementary Material S2. Distribution of freshwater mollusk studies by country and thematic category in Latin America and the Caribbean.
	N	%			Conservation	Ecology	Evolution	Physiology	Genetics	Morphology	Paleontology	Parasitology	Taxonomy
Argentina	64	32.9897		Argentina	19	17	2	10	4	8	3	7	4
Brasil	67	34.5361		Brasil	28	14	4	3	6	6	3	6	6
Bolivia	3	1.54639		Bolivia	1		1		1			1
Chile	13	6.70103		Chile	3	3	1	1	5	1			2
Colombia	1	0.515464		Colombia			1		1
Costa Rica	0	0		Costa Rica
Cuba	1	0.515464		Cuba									1
República Dominicana	0	0		República Dominicana
Ecuador	1	0.515464		Ecuador							1
Guatemala	1	0.515464		Guatemala	1
Honduras	0	0		Honduras
México	25	12.8866		México	6	5			5	1	3	1	8
Nicaragua	0	0		Nicaragua	2
Panamá	0	0		Panamá
Paraguay	5	2.57732		Paraguay			1			1			1
Perú	2	1.03093		Perú			1		2				1
El Salvador	0	0		El Salvador
Uruguay	5	2.57732		Uruguay	4	3							1
Venezuela	6	3.09278		Venezuela			1		2		1	1	1
	194			Totales categoría	64	42	12	14	26	17	11	16	25	227
				% Categoria	28.1938	18.5022	5.28634	6.1674	11.4537	7.48899	4.84581	7.04846	11.0132	100

## Sheet: S3
Supplementary Material S3. Taxonomic composition and frequency of freshwater mollusk species reported in the bibliometric dataset from Latin America and the Caribbean.
N	SPECIES	FAMILY	ORDERR	CLASS	COUNT	NAME CHANGE - FORMER NAME	TOTAL PRESENT	PERCENTAGE
1	Limnoperna fortunei	Mytilidae	Mytiloida	Bivalvia	37	Iphigenia brasiliana	117	Bivalvia	46.6135
2	Corbicula fluminea	Cyrenidae	Veneroida	Bivalvia	26		134	Gastropoda	53.3865
3	Melanoides tuberculata	Thiaridae	Caenogastropoda	Gastropoda	18			GASTROPODA	%
4	Biomphalaria straminea	Planorbidae	Hygrophila	Gastropoda	16		57	Hygrophila	42.5373
5	Corbicula largillierti	Cyrenidae	Veneroida	Bivalvia	11		51	Littorinimorpha	38.0597
6	Pomacea canaliculata	Ampullariidae	Architaenioglossa	Gastropoda	11		13	Architaenioglossa	9.70149
7	Biomphalaria peregrina	Planorbidae	Hygrophila	Gastropoda	10		5	Caenogastropoda	3.73134
8	Biomphalaria tenagophila	Planorbidae	Hygrophila	Gastropoda	10		5	Stylommatophora	3.73134
9	Anodontites trapesialis	Mycetopodidae	Unionoida	Bivalvia	9		2	Cycloneritida	1.49254
10	Heleobia parchappii	Cochliopidae	Littorinimorpha	Gastropoda	8		1	Neogastropoda	0.746269
11	Diplodon chilensis	Hyriidae	Unionoida	Bivalvia	7			BIVALVIA	%
12	Biomphalaria glabrata	Planorbidae	Hygrophila	Gastropoda	6		83	Unionoida	70.9402
13	Physa acuta	Physidae	Hygrophila	Gastropoda	6		17	Sphaeriida	14.5299
14	Pisidium sterkianum	Sphaeriidae	Sphaeriida	Bivalvia	5		7	Myida	5.98291
15	Biomphalaria occidentalis	Planorbidae	Hygrophila	Gastropoda	5		5	Veneroida	4.2735
16	Stenophysa marmorata	Physidae	Hygrophila	Gastropoda	5		2	Ostreida	1.7094
17	Uncancylus concentricus	Planorbidae	Hygrophila	Gastropoda	5		1	Cardiida	0.854701
18	Eupera klappenbachi	Sphaeriidae	Sphaeriida	Bivalvia	4		1	Mytiloida	0.854701
19	Castalia ambigua	Hyriidae	Unionoida	Bivalvia	4		1	Trigoniida	0.854701
20	Castalia inflata	Hyriidae	Unionoida	Bivalvia	4
21	Diplodon rhuacoicus	Hyriidae	Unionoida	Bivalvia	4
22	Pomacea patula catemacensi	Ampullariidae	Architaenioglossa	Gastropoda	4
23	Drepanotrema cimex	Planorbidae	Hygrophila	Gastropoda	4
24	Anodontites elongatus	Mycetopodidae	Unionoida	Bivalvia	3
25	Anodontites patagonica	Mycetopodidae	Unionoida	Bivalvia	3
26	Anodontites tenebricosus	Mycetopodidae	Unionoida	Bivalvia	3
27	Anodontites trapezeus	Mycetopodidae	Unionoida	Bivalvia	3
28	Diplodon delodontus	Hyriidae	Unionoida	Bivalvia	3
29	Diplodon ellipticus	Hyriidae	Unionoida	Bivalvia	3
30	Popenaias popeii	Unionidae	Unionoida	Bivalvia	3
31	Pomacea americanista	Ampullariidae	Architaenioglossa	Gastropoda	3
32	Pomacea flagellata	Ampullariidae	Architaenioglossa	Gastropoda	3
33	Pomacea lineata	Ampullariidae	Architaenioglossa	Gastropoda	3
34	Pomacea sp.	Ampullariidae	Architaenioglossa	Gastropoda	3
35	Biomphalaria havanensis	Planorbidae	Hygrophila	Gastropoda	3
36	Biomphalaria sp.	Planorbidae	Hygrophila	Gastropoda	3
37	Chilina dombeiana	Chilinidae	Hygrophila	Gastropoda	3
38	Drepanotrema depressissimum	Planorbidae	Hygrophila	Gastropoda	3
39	Pseudosuccinea columella	Lymnaeidae	Hygrophila	Gastropoda	3
40	Pseudosuccinea columella	Lymnaeidae	Hygrophila	Gastropoda	3
41	Aylacostoma brunneum	Hemisinidae	Littorinimorpha	Gastropoda	3
42	Aylacostoma chloroticum	Hemisinidae	Littorinimorpha	Gastropoda	3
43	Heleobia australis	Cochliopidae	Littorinimorpha	Gastropoda	3
44	Heleobia bertoniana	Cochliopidae	Littorinimorpha	Gastropoda	3
45	Heleobia hatcheri	Cochliopidae	Littorinimorpha	Gastropoda	3
46	Heleobia sp	Cochliopidae	Littorinimorpha	Gastropoda	3
47	Dreissena bugensis	Dreissenidae	Myida	Bivalvia	2
48	Dreissena polymorpha	Dreissenidae	Myida	Bivalvia	2
49	Euglesa compressa	Sphaeriidae	Sphaeriida	Bivalvia	2
50	Eupera elliptica	Sphaeriidae	Sphaeriida	Bivalvia	2
51	Musculium argentinum	Sphaeriidae	Sphaeriida	Bivalvia	2
52	Pisidium dorbignyi	Sphaeriidae	Sphaeriida	Bivalvia	2
53	Pisidium punctiferum	Sphaeriidae	Sphaeriida	Bivalvia	2
54	Pisidium sp.	Sphaeriidae	Sphaeriida	Bivalvia	2
55	Castalia martensi	Hyriidae	Unionoida	Bivalvia	2
56	Diplodon martensi	Hyriidae	Unionoida	Bivalvia	2
57	Diplodon multistriatus	Hyriidae	Unionoida	Bivalvia	2
58	Diplodon parallelopipedon	Hyriidae	Unionoida	Bivalvia	2
59	Diplodon sp	Hyriidae	Unionoida	Bivalvia	2
60	Fossula fossiculifera	Mycetopodidae	Unionoida	Bivalvia	2
61	Lamproscapha ensiformis	Unionidae	Unionoida	Bivalvia	2
62	Leila blainvilliana	Unionidae	Unionoida	Bivalvia	2
63	Monocondylaea corrientesensis	Mycetopodidae	Unionoida	Bivalvia	2
64	Monocondylaea minuana	Mycetopodidae	Unionoida	Bivalvia	2
65	Mycetopoda legumen	Mycetopodidae	Unionoida	Bivalvia	2
66	Mycetopoda siliquosa	Mycetopodidae	Unionoida	Bivalvia	2
67	Prisodon obliquus	Hyriidae	Unionoida	Bivalvia	2
68	Prisodon syrmatophorus	Hyriidae	Unionoida	Bivalvia	2
69	Quadrula couchiana	Unionidae	Unionoida	Bivalvia	2
70	Triplodon corrugatus	Hyriidae	Unionoida	Bivalvia	2
71	Cyanocyclas limosa	Cyrenoididae	Veneroida	Bivalvia	2
72	Corbicula spp	Cyrenidae	Veneroida	Bivalvia	2
73	Asolene spixi	Ampullariidae	Architaenioglossa	Gastropoda	2
74	Pomacea maculata	Ampullariidae	Architaenioglossa	Gastropoda	2
75	Sinotaia quadrata	Viviparidae	Architaenioglossa	Gastropoda	2
76	Tarebia granifera	Thiaridae	Caenogastropoda	Gastropoda	2
77	Anisancylus obliquus	Planorbidae	Hygrophila	Gastropoda	2
78	Antillorbis nordestensis	Planorbidae	Hygrophila	Gastropoda	2
79	Biomphalaria amazonica	Planorbidae	Hygrophila	Gastropoda	2
80	Biomphalaria kuhniana	Planorbidae	Hygrophila	Gastropoda	2
81	Chilina parchappii	Chilinidae	Hygrophila	Gastropoda	2
82	Drepanotrema lucidum	Planorbidae	Hygrophila	Gastropoda	2
83	Gundlachia ticaga	Planorbidae	Hygrophila	Gastropoda	2
84	Hebetancylus excentricus	Planorbidae	Hygrophila	Gastropoda	2	Quincuncina mitchelli
85	Hebetancylus moricandi	Planorbidae	Hygrophila	Gastropoda	2
86	Lymnaea sp.	Lymnaeidae	Hygrophila	Gastropoda	2
87	Aylacostoma guaraniticum	Hemisinidae	Littorinimorpha	Gastropoda	2
88	Aylacostoma stigmaticum	Hemisinidae	Littorinimorpha	Gastropoda	2
89	Cincinnatia integra	Hydrobiidae	Littorinimorpha	Gastropoda	2
90	Coahuilix parrasense	Cochliopidae	Littorinimorpha	Gastropoda	2
91	Juturnia coahuilae	Cochliopidae	Littorinimorpha	Gastropoda	2
92	Mexipyrgus carranzae	Cochliopidae	Littorinimorpha	Gastropoda	2
93	Phreatomascogos gregoi	Lithoglyphidae	Littorinimorpha	Gastropoda	2
94	Potamolithus catharinae	Tateidae	Littorinimorpha	Gastropoda	2
95	Potamolithus ribeirensis	Tateidae	Littorinimorpha	Gastropoda	2
96	Potamopyrgus antipodarum	Tateidae	Littorinimorpha	Gastropoda	2
97	Pyrgophoru coronatus	Cochliopidae	Littorinimorpha	Gastropoda	2
98	Omalonyx matheroni	Succineidae	Stylommatophora	Gastropoda	2
99	Omalonyx sp.	Succineidae	Stylommatophora	Gastropoda	2
100	Iphigenia brasiliensis	Donacidae	Cardiida	Bivalvia	1
101	Congeria spp.	Dreissenidae	Myida	Bivalvia	1	Paxyodon syrmatophorus
102	Dreissena rostriformis bugensis	Dreissenidae	Myida	Bivalvia	1
103	Dreissena spp.	Dreissenidae	Myida	Bivalvia	1
104	Pachydon hettneri	Corbulidae	Myida	Bivalvia	1
105	Rheodresissena spp	Dreissenidae	Myida	Bivalvia	1
106	Crassostrea rhizophoras	Ostreidae	Ostreida	Bivalvia	1
107	Crassostrea virginica	Ostreidae	Ostreida	Bivalvia	1
108	Eupera cubensis	Sphaeriidae	Sphaeriida	Bivalvia	1
109	Eupera platensis	Sphaeriidae	Sphaeriida	Bivalvia	1
110	Musculium partumelum	Sphaeriidae	Sphaeriida	Bivalvia	1
111	Musculium patagonicum	Sphaeriidae	Sphaeriida	Bivalvia	1
112	Musculium sp	Sphaeriidae	Sphaeriida	Bivalvia	1
113	Musculium transversum	Sphaeriidae	Sphaeriida	Bivalvia	1
114	Pisidium globulus	Sphaeriidae	Sphaeriida	Bivalvia	1
115	Pisidium nitidum	Sphaeriidae	Sphaeriida	Bivalvia	1
116	Sphaeriidae	Sphaeriidae	Sphaeriida	Bivalvia	1
117	Pterotrigonia flava	Pterogoniidae	Trigoniida	Bivalvia	1
118	Actinonaias coyensis	Unionidae	Unionoida	Bivalvia	1
119	Actinonaias medellina	Unionidae	Unionoida	Bivalvia	1
120	Actinonaias signata	Unionidae	Unionoida	Bivalvia	1
121	Anodonta impura	Mycetopodidae	Unionoida	Bivalvia	1
122	Anodontites cylindracea	Mycetopodidae	Unionoida	Bivalvia	1
123	Anodontites ferrarisi	Mycetopodidae	Unionoida	Bivalvia	1
124	Anodontites iheringi	Mycetopodidae	Unionoida	Bivalvia	1
125	Anodontites laevigatus	Mycetopodidae	Unionoida	Bivalvia	1
126	Anodontites lucidus	Mycetopodidae	Unionoida	Bivalvia	1
127	Anodontites obtusus	Mycetopodidae	Unionoida	Bivalvia	1	Pomella megastoma
128	Anodontites pacha	Mycetopodidae	Unionoida	Bivalvia	1
129	Anodontites soleniformis	Mycetopodidae	Unionoida	Bivalvia	1
130	Anodontites sp.	Mycetopodidae	Unionoida	Bivalvia	1
131	Anodontites trigonus	Mycetopodidae	Unionoida	Bivalvia	1
132	Callonaia duprei	Hyriidae	Unionoida	Bivalvia	1
133	Castalia psammotica	Hyriidae	Unionoida	Bivalvia	1
134	Castalia quadrata	Hyriidae	Unionoida	Bivalvia	1
135	Castalia stevensi	Hyriidae	Unionoida	Bivalvia	1
136	Cyrtonaias tampicoensis	Unionidae	Unionoida	Bivalvia	1
137	Diplodon (Rhipidodonta) charruanus	Hyriidae	Unionoida	Bivalvia	1	Neritina reclivata
138	Diplodon (Rhipidodonta) deceptus	Hyriidae	Unionoida	Bivalvia	1
139	Diplodon (Rhipidodonta) koseritzi	Hyriidae	Unionoida	Bivalvia	1
140	Diplodon berthae	Hyriidae	Unionoida	Bivalvia	1
141	Diplodon demeraraensis	Hyriidae	Unionoida	Bivalvia	1
142	Diplodon enno	Hyriidae	Unionoida	Bivalvia	1
143	Diplodon fontaineanus	Hyriidae	Unionoida	Bivalvia	1
144	Diplodon granosus	Hyriidae	Unionoida	Bivalvia	1
145	Diplodon granosus multistriatus	Hyriidae	Unionoida	Bivalvia	1
146	Diplodon hildae	Hyriidae	Unionoida	Bivalvia	1
147	Diplodon parodizi	Hyriidae	Unionoida	Bivalvia	1
148	Diplodon pilsbryi	Hyriidae	Unionoida	Bivalvia	1
149	Diplodon rotundus	Hyriidae	Unionoida	Bivalvia	1
150	Diplodon suavidicus	Hyriidae	Unionoida	Bivalvia	1
151	Diplodon wymaunii	Hyriidae	Unionoida	Bivalvia	1
152	Disconaias disca	Unionidae	Unionoida	Bivalvia	1
153	Disconaias fimbriata	Unionidae	Unionoida	Bivalvia	1
154	Friersonia iridella	Unionidae	Unionoida	Bivalvia	1
155	Fusconaia mitchelli	Unionidae	Unionoida	Bivalvia	1
156	Megalonaias nickliniana	Unionidae	Unionoida	Bivalvia	1
157	Monocondylaea pacha	Mycetopodidae	Unionoida	Bivalvia	1
158	Monocondylaea paraguayana	Mycetopodidae	Unionoida	Bivalvia	1
159	Mycetopoda soleniformis.	Mycetopodidae	Unionoida	Bivalvia	1
160	Nephronaias aztecorum	Unionidae	Unionoida	Bivalvia	1
161	Popenaias berezai	Unionidae	Unionoida	Bivalvia	1
162	Popenaias semirasa	Unionidae	Unionoida	Bivalvia	1
163	Potamilus metnecktayi	Unionidae	Unionoida	Bivalvia	1
164	Psoronaias semigranosa	Unionidae	Unionoida	Bivalvia	1
165	Rhipidodonta burroughiana	Hyriidae	Unionoida	Bivalvia	1
166	Rhipidodonta charruana	Hyriidae	Unionoida	Bivalvia	1
167	Rhipidodonta garbei	Hyriidae	Unionoida	Bivalvia	1
168	Rhipidodonta hylaea	Hyriidae	Unionoida	Bivalvia	1
169	Rhipidodonta paranensis	Hyriidae	Unionoida	Bivalvia	1
170	Rhipidodonta variabilis	Hyriidae	Unionoida	Bivalvia	1
171	Truncilla cognata	Unionidae	Unionoida	Bivalvia	1	Ferissia fragilis
172	Utterbackia imbecillis	Unionidae	Unionoida	Bivalvia	1
173	Corbicula fluminalis	Cyrenidae	Veneroida	Bivalvia	1
174	Asolene platae	Ampullariidae	Architaenioglossa	Gastropoda	1
175	Marisa sp.	Ampullariidae	Architaenioglossa	Gastropoda	1
176	Pomacea haustrum	Ampullariidae	Architaenioglossa	Gastropoda	1
177	Pomacea megastoma	Ampullariidae	Architaenioglossa	Gastropoda	1
178	Balconorbis sabinasensis	Hemisinidae	Caenogastropoda	Gastropoda	1
179	Balconorbis uvaldensis	Hemisinidae	Caenogastropoda	Gastropoda	1
180	Melanoides spp.	Thiaridae	Caenogastropoda	Gastropoda	1
181	Neritina virginea	Neritidae	Cycloneritida	Gastropoda	1
182	Vitta usnea	Neritidae	Cycloneritida	Gastropoda	1
183	Biomphalaria helophila	Planorbidae	Hygrophila	Gastropoda	1
184	Biomphalaria oligoza	Planorbidae	Hygrophila	Gastropoda	1
185	Biomphalaria orbignyi	Planorbidae	Hygrophila	Gastropoda	1
186	Biomphalaria pallida	Planorbidae	Hygrophila	Gastropoda	1
187	Biomphalaria schrammi	Planorbidae	Hygrophila	Gastropoda	1
188	Biomphalaria tenagophila tenagophila	Planorbidae	Hygrophila	Gastropoda	1
189	Burnupia ingae	Burnupiidae	Hygrophila	Gastropoda	1	Planorbella cf. trivolvis
190	Chilina gibbosa	Chilinidae	Hygrophila	Gastropoda	1	Lymnaea columella
191	Chilina luciae	Chilinidae	Hygrophila	Gastropoda	1
192	Chilina mendozana	Chilinidae	Hygrophila	Gastropoda	1	Aplexa marmorata
193	Chilina nicolasi	Chilinidae	Hygrophila	Gastropoda	1
194	Chilina ovalis	Chilinidae	Hygrophila	Gastropoda	1
195	Chilina santiagoi	Chilinidae	Hygrophila	Gastropoda	1
196	Drepanotrema heloicum	Planorbidae	Hygrophila	Gastropoda	1
197	Drepanotrema kermatoides	Planorbidae	Hygrophila	Gastropoda	1
198	Drepanotrema schubarti	Planorbidae	Hygrophila	Gastropoda	1
199	Drepanotrema spp.	Planorbidae	Hygrophila	Gastropoda	1
200	Ferrissia californica	Ancylidae	Hygrophila	Gastropoda	1
201	Galba sp.	Lymnaeidae	Hygrophila	Gastropoda	1
202	Gyraulus parvus	Planorbidae	Hygrophila	Gastropoda	1
203	Helisoma anceps	Planorbidae	Hygrophila	Gastropoda	1
204	Lymnaea viator	Lymnaeidae	Hygrophila	Gastropoda	1
205	Mayabina polita	Physidae	Hygrophila	Gastropoda	1
206	Menetus dilatatus	Planorbidae	Hygrophila	Gastropoda	1
207	Mexinauta impluviatus	Physidae	Hygrophila	Gastropoda	1
208	Planorbella dury	Planorbidae	Hygrophila	Gastropoda	1
209	Planorbella scalaris	Planorbidae	Hygrophila	Gastropoda	1
210	Planorbella trivolvis	Planorbidae	Hygrophila	Gastropoda	1
211	Stenophysa spiculata	Physidae	Hygrophila	Gastropoda	1
212	Aphaostracon theiocrenetum	Cochliopidae	Littorinimorpha	Gastropoda	1
213	Aroapyrgus clenchi	Cochliopidae	Littorinimorpha	Gastropoda	1
214	Assiminea cienegensis	Assimineidae	Littorinimorpha	Gastropoda	1
215	Coahuilix cf. landyei	Cochliopidae	Littorinimorpha	Gastropoda	1
216	Coahuilix hubbsi	Cochliopidae	Littorinimorpha	Gastropoda	1
217	Cochliopina riograndensis	Cochliopidae	Littorinimorpha	Gastropoda	1
218	Eremopyrgus elegans	Cochliopidae	Littorinimorpha	Gastropoda	1
219	Heleobia aff. parchappii	Cochliopidae	Littorinimorpha	Gastropoda	1
220	Heleobia conexa	Cochliopidae	Littorinimorpha	Gastropoda	1
221	Heleobia piscium	Cochliopidae	Littorinimorpha	Gastropoda	1	Mexipyrgus mojarralis y M. churinceanus
222	Idiopyrgus sp.	Tomichiidae	Littorinimorpha	Gastropoda	1
223	Littoridinops tenuipes	Cochliopidae	Littorinimorpha	Gastropoda	1	Mexithauma cf. quadripaludium
224	Littorina angulifera	Cochliopidae	Littorinimorpha	Gastropoda	1
225	Lyogyrus sp.	Amnicolidae	Littorinimorpha	Gastropoda	1
226	Mexipyrgus viescaensis	Cochliopidae	Littorinimorpha	Gastropoda	1
227	Mexithauma quadripaludium	Cochliopidae	Littorinimorpha	Gastropoda	1
228	Potamolithus aff. Buschi	Tateidae	Littorinimorpha	Gastropoda	1
229	Potamolithus grossus	Tateidae	Littorinimorpha	Gastropoda	1
230	Potamolithus nelidae	Tateidae	Littorinimorpha	Gastropoda	1
231	Potamolithus nezibrus	Tateidae	Littorinimorpha	Gastropoda	1
232	Potamolithus rauli	Tateidae	Littorinimorpha	Gastropoda	1
233	Potamolithus recurvatus	Tateidae	Littorinimorpha	Gastropoda	1
234	Potamolithus spp.	Tateidae	Littorinimorpha	Gastropoda	1
235	Potamolithus tricarinatus	Tateidae	Littorinimorpha	Gastropoda	1
236	Probythinella protera	Hydrobiidae	Littorinimorpha	Gastropoda	1
237	Pyrgophorus parvulus	Cochliopidae	Littorinimorpha	Gastropoda	1
238	Pyrgophorus platyrachis	Cochliopidae	Littorinimorpha	Gastropoda	1
239	Pyrgulopsis manantiali	Cochliopidae	Littorinimorpha	Gastropoda	1
240	Pyrgulopsis minckleyi	Hydrobiidae	Littorinimorpha	Gastropoda	1
241	Pyrgulopsis paleoacarinatus	Cochliopidae	Littorinimorpha	Gastropoda	1	Nymphophilus minckleyi
242	Pyrgulopsis paleominckleyi	Cochliopidae	Littorinimorpha	Gastropoda	1
243	Teinostoma brankovitsi	Teinostomatidae	Littorinimorpha	Gastropoda	1
244	Tryonia porrecta	Cochliopidae	Littorinimorpha	Gastropoda	1
245	Phrontis vibex	Nassariidae	Neogastropoda	Gastropoda	1
246	Omalonyx convexus	Succineidae	Stylommatophora	Gastropoda	1	Nassarius vibex
247	Succinea meridionalis	Succineidae	Stylommatophora	Gastropoda	1
248	Succinea puna	Succineidae	Stylommatophora	Gastropoda	1
249	Physa cubensis	Physidae	Hygrophila	Gastropoda	1
250	Physa marmorata	Physidae	Hygrophila	Gastropoda	1
251	Physella acuta	Physidae	Hygrophila	Gastropoda	1

## Sheet: S4
Supplementary Material S4. Pivot-table summary of the freshwater mollusk species list (S3), showing taxonomic hierarchy (class, order, family, and species) and counts in Latin America and the Caribbean
Etiquetas de fila	Cuenta de CLASE	Cuenta de ORDEN	Cuenta de FAMILIA	Cuenta de ESPECIE
Bivalvia	117	117	117	117
Cardiida	1	1	1	1
Donacidae	1	1	1	1
Iphigenia brasiliensis	1	1	1	1
Myida	7	7	7	7
Corbulidae	1	1	1	1
Pachydon hettneri	1	1	1	1
Dreissenidae	6	6	6	6
Congeria spp.	1	1	1	1
Dreissena bugensis	1	1	1	1
Dreissena polymorpha	1	1	1	1
Dreissena rostriformis bugensis	1	1	1	1
Dreissena spp.	1	1	1	1
Rheodresissena spp	1	1	1	1
Mytiloida	1	1	1	1
Mytilidae	1	1	1	1
Limnoperna fortunei	1	1	1	1
Ostreida	2	2	2	2
Ostreidae	2	2	2	2
Crassostrea rhizophoras	1	1	1	1
Crassostrea virginica	1	1	1	1
Sphaeriida	17	17	17	17
Sphaeriidae	17	17	17	17
Euglesa compressa	1	1	1	1
Eupera cubensis	1	1	1	1
Eupera elliptica	1	1	1	1
Eupera klappenbachi	1	1	1	1
Eupera platensis	1	1	1	1
Musculium argentinum	1	1	1	1
Musculium partumelum	1	1	1	1
Musculium patagonicum	1	1	1	1
Musculium sp	1	1	1	1
Musculium transversum	1	1	1	1
Pisidium dorbignyi	1	1	1	1
Pisidium globulus	1	1	1	1
Pisidium nitidum	1	1	1	1
Pisidium punctiferum	1	1	1	1
Pisidium sp.	1	1	1	1
Pisidium sterkianum	1	1	1	1
Sphaeriidae	1	1	1	1
Trigoniida	1	1	1	1
Pterogoniidae	1	1	1	1
Pterotrigonia flava	1	1	1	1
Unionoida	83	83	83	83
Hyriidae	39	39	39	39
Callonaia duprei	1	1	1	1
Castalia ambigua	1	1	1	1
Castalia inflata	1	1	1	1
Castalia martensi	1	1	1	1
Castalia psammotica	1	1	1	1
Castalia quadrata	1	1	1	1
Castalia stevensi	1	1	1	1
Diplodon (Rhipidodonta) charruanus	1	1	1	1
Diplodon (Rhipidodonta) deceptus	1	1	1	1
Diplodon (Rhipidodonta) koseritzi	1	1	1	1
Diplodon berthae	1	1	1	1
Diplodon chilensis	1	1	1	1
Diplodon delodontus	1	1	1	1
Diplodon demeraraensis	1	1	1	1
Diplodon ellipticus	1	1	1	1
Diplodon enno	1	1	1	1
Diplodon fontaineanus	1	1	1	1
Diplodon granosus	1	1	1	1
Diplodon granosus multistriatus	1	1	1	1
Diplodon hildae	1	1	1	1
Diplodon martensi	1	1	1	1
Diplodon multistriatus	1	1	1	1
Diplodon parallelopipedon	1	1	1	1
Diplodon parodizi	1	1	1	1
Diplodon pilsbryi	1	1	1	1
Diplodon rhuacoicus	1	1	1	1
Diplodon rotundus	1	1	1	1
Diplodon sp	1	1	1	1
Diplodon suavidicus	1	1	1	1
Diplodon wymaunii	1	1	1	1
Prisodon obliquus	1	1	1	1
Prisodon syrmatophorus	1	1	1	1
Rhipidodonta burroughiana	1	1	1	1
Rhipidodonta charruana	1	1	1	1
Rhipidodonta garbei	1	1	1	1
Rhipidodonta hylaea	1	1	1	1
Rhipidodonta paranensis	1	1	1	1
Rhipidodonta variabilis	1	1	1	1
Triplodon corrugatus	1	1	1	1
Mycetopodidae	24	24	24	24
Anodonta impura	1	1	1	1
Anodontites cylindracea	1	1	1	1
Anodontites elongatus	1	1	1	1
Anodontites ferrarisi	1	1	1	1
Anodontites iheringi	1	1	1	1
Anodontites laevigatus	1	1	1	1
Anodontites lucidus	1	1	1	1
Anodontites obtusus	1	1	1	1
Anodontites pacha	1	1	1	1
Anodontites patagonica	1	1	1	1
Anodontites soleniformis	1	1	1	1
Anodontites sp.	1	1	1	1
Anodontites tenebricosus	1	1	1	1
Anodontites trapesialis	1	1	1	1
Anodontites trapezeus	1	1	1	1
Anodontites trigonus	1	1	1	1
Fossula fossiculifera	1	1	1	1
Monocondylaea corrientesensis	1	1	1	1
Monocondylaea minuana	1	1	1	1
Monocondylaea pacha	1	1	1	1
Monocondylaea paraguayana	1	1	1	1
Mycetopoda legumen	1	1	1	1
Mycetopoda siliquosa	1	1	1	1
Mycetopoda soleniformis.	1	1	1	1
Unionidae	20	20	20	20
Actinonaias coyensis	1	1	1	1
Actinonaias medellina	1	1	1	1
Actinonaias signata	1	1	1	1
Cyrtonaias tampicoensis	1	1	1	1
Disconaias disca	1	1	1	1
Disconaias fimbriata	1	1	1	1
Friersonia iridella	1	1	1	1
Fusconaia mitchelli	1	1	1	1
Lamproscapha ensiformis	1	1	1	1
Leila blainvilliana	1	1	1	1
Megalonaias nickliniana	1	1	1	1
Nephronaias aztecorum	1	1	1	1
Popenaias berezai	1	1	1	1
Popenaias popeii	1	1	1	1
Popenaias semirasa	1	1	1	1
Potamilus metnecktayi	1	1	1	1
Psoronaias semigranosa	1	1	1	1
Quadrula couchiana	1	1	1	1
Truncilla cognata	1	1	1	1
Utterbackia imbecillis	1	1	1	1
Veneroida	5	5	5	5
Cyrenidae	4	4	4	4
Corbicula fluminalis	1	1	1	1
Corbicula fluminea	1	1	1	1
Corbicula largillierti	1	1	1	1
Corbicula spp	1	1	1	1
Cyrenoididae	1	1	1	1
Cyanocyclas limosa	1	1	1	1
Gastropoda	134	134	134	134
Architaenioglossa	13	13	13	13
Ampullariidae	12	12	12	12
Asolene platae	1	1	1	1
Asolene spixi	1	1	1	1
Marisa sp.	1	1	1	1
Pomacea americanista	1	1	1	1
Pomacea canaliculata	1	1	1	1
Pomacea flagellata	1	1	1	1
Pomacea haustrum	1	1	1	1
Pomacea lineata	1	1	1	1
Pomacea maculata	1	1	1	1
Pomacea megastoma	1	1	1	1
Pomacea patula catemacensi	1	1	1	1
Pomacea sp.	1	1	1	1
Viviparidae	1	1	1	1
Sinotaia quadrata	1	1	1	1
Caenogastropoda	5	5	5	5
Hemisinidae	2	2	2	2
Balconorbis sabinasensis	1	1	1	1
Balconorbis uvaldensis	1	1	1	1
Thiaridae	3	3	3	3
Melanoides spp.	1	1	1	1
Melanoides tuberculata	1	1	1	1
Tarebia granifera	1	1	1	1
Cycloneritida	2	2	2	2
Neritidae	2	2	2	2
Neritina virginea	1	1	1	1
Vitta usnea	1	1	1	1
Hygrophila	57	57	57	57
Ancylidae	1	1	1	1
Ferrissia californica	1	1	1	1
Burnupiidae	1	1	1	1
Burnupia ingae	1	1	1	1
Chilinidae	8	8	8	8
Chilina dombeiana	1	1	1	1
Chilina gibbosa	1	1	1	1
Chilina luciae	1	1	1	1
Chilina mendozana	1	1	1	1
Chilina nicolasi	1	1	1	1
Chilina ovalis	1	1	1	1
Chilina parchappii	1	1	1	1
Chilina santiagoi	1	1	1	1
Lymnaeidae	5	5	5	5
Galba sp.	1	1	1	1
Lymnaea sp.	1	1	1	1
Lymnaea viator	1	1	1	1
Pseudosuccinea columella	2	2	2	2
Physidae	8	8	8	8
Mayabina polita	1	1	1	1
Mexinauta impluviatus	1	1	1	1
Physa acuta	1	1	1	1
Physa cubensis	1	1	1	1
Physa marmorata	1	1	1	1
Physella acuta	1	1	1	1
Stenophysa marmorata	1	1	1	1
Stenophysa spiculata	1	1	1	1
Planorbidae	34	34	34	34
Anisancylus obliquus	1	1	1	1
Antillorbis nordestensis	1	1	1	1
Biomphalaria amazonica	1	1	1	1
Biomphalaria glabrata	1	1	1	1
Biomphalaria havanensis	1	1	1	1
Biomphalaria helophila	1	1	1	1
Biomphalaria kuhniana	1	1	1	1
Biomphalaria occidentalis	1	1	1	1
Biomphalaria oligoza	1	1	1	1
Biomphalaria orbignyi	1	1	1	1
Biomphalaria pallida	1	1	1	1
Biomphalaria peregrina	1	1	1	1
Biomphalaria schrammi	1	1	1	1
Biomphalaria sp.	1	1	1	1
Biomphalaria straminea	1	1	1	1
Biomphalaria tenagophila	1	1	1	1
Biomphalaria tenagophila tenagophila	1	1	1	1
Drepanotrema cimex	1	1	1	1
Drepanotrema depressissimum	1	1	1	1
Drepanotrema heloicum	1	1	1	1
Drepanotrema kermatoides	1	1	1	1
Drepanotrema lucidum	1	1	1	1
Drepanotrema schubarti	1	1	1	1
Drepanotrema spp.	1	1	1	1
Gundlachia ticaga	1	1	1	1
Gyraulus parvus	1	1	1	1
Hebetancylus excentricus	1	1	1	1
Hebetancylus moricandi	1	1	1	1
Helisoma anceps	1	1	1	1
Menetus dilatatus	1	1	1	1
Planorbella dury	1	1	1	1
Planorbella scalaris	1	1	1	1
Planorbella trivolvis	1	1	1	1
Uncancylus concentricus	1	1	1	1
Littorinimorpha	51	51	51	51
Amnicolidae	1	1	1	1
Lyogyrus sp.	1	1	1	1
Assimineidae	1	1	1	1
Assiminea cienegensis	1	1	1	1
Cochliopidae	28	28	28	28
Aphaostracon theiocrenetum	1	1	1	1
Aroapyrgus clenchi	1	1	1	1
Coahuilix cf. landyei	1	1	1	1
Coahuilix hubbsi	1	1	1	1
Coahuilix parrasense	1	1	1	1
Cochliopina riograndensis	1	1	1	1
Eremopyrgus elegans	1	1	1	1
Heleobia aff. parchappii	1	1	1	1
Heleobia australis	1	1	1	1
Heleobia bertoniana	1	1	1	1
Heleobia conexa	1	1	1	1
Heleobia hatcheri	1	1	1	1
Heleobia parchappii	1	1	1	1
Heleobia piscium	1	1	1	1
Heleobia sp	1	1	1	1
Juturnia coahuilae	1	1	1	1
Littoridinops tenuipes	1	1	1	1
Littorina angulifera	1	1	1	1
Mexipyrgus carranzae	1	1	1	1
Mexipyrgus viescaensis	1	1	1	1
Mexithauma quadripaludium	1	1	1	1
Pyrgophoru coronatus	1	1	1	1
Pyrgophorus parvulus	1	1	1	1
Pyrgophorus platyrachis	1	1	1	1
Pyrgulopsis manantiali	1	1	1	1
Pyrgulopsis paleoacarinatus	1	1	1	1
Pyrgulopsis paleominckleyi	1	1	1	1
Tryonia porrecta	1	1	1	1
Hemisinidae	4	4	4	4
Aylacostoma brunneum	1	1	1	1
Aylacostoma chloroticum	1	1	1	1
Aylacostoma guaraniticum	1	1	1	1
Aylacostoma stigmaticum	1	1	1	1
Hydrobiidae	3	3	3	3
Cincinnatia integra	1	1	1	1
Probythinella protera	1	1	1	1
Pyrgulopsis minckleyi	1	1	1	1
Lithoglyphidae	1	1	1	1
Phreatomascogos gregoi	1	1	1	1
Tateidae	11	11	11	11
Potamolithus aff. Buschi	1	1	1	1
Potamolithus catharinae	1	1	1	1
Potamolithus grossus	1	1	1	1
Potamolithus nelidae	1	1	1	1
Potamolithus nezibrus	1	1	1	1
Potamolithus rauli	1	1	1	1
Potamolithus recurvatus	1	1	1	1
Potamolithus ribeirensis	1	1	1	1
Potamolithus spp.	1	1	1	1
Potamolithus tricarinatus	1	1	1	1
Potamopyrgus antipodarum	1	1	1	1
Teinostomatidae	1	1	1	1
Teinostoma brankovitsi	1	1	1	1
Tomichiidae	1	1	1	1
Idiopyrgus sp.	1	1	1	1
Neogastropoda	1	1	1	1
Nassariidae	1	1	1	1
Phrontis vibex	1	1	1	1
Stylommatophora	5	5	5	5
Succineidae	5	5	5	5
Omalonyx convexus	1	1	1	1
Omalonyx matheroni	1	1	1	1
Omalonyx sp.	1	1	1	1
Succinea meridionalis	1	1	1	1
Succinea puna	1	1	1	1
(en blanco)
(en blanco)
Total general	251	251	251	251

## Sheet: S5
Supplementary Material S5. List of freshwater mollusk species and their IUCN Red List conservation status in Latin America and the Caribbean.
SPECIES	IUCN RED LIST CATEGORY
Limnoperna fortunei	LC
Corbicula fluminea	LC
Melanoides tuberculata	LC		IUCN categories follow the IUCN Red List of Threatened Species (LC: Least Concern; NT: Near Threatened; VU: Vulnerable; EN: Endangered; CR: Critically Endangered; EW: Extinct in the Wild; DD: Data Deficient; NE: Not Evaluated; NA: Not Applicable).
Biomphalaria straminea	NE
Corbicula largillierti	NE
Pomacea canaliculata	LC
Biomphalaria peregrina	NE
Biomphalaria tenagophila	NE
Anodontites trapesialis	NE
Heleobia parchappii	NE
Diplodon chilensis	LC
Biomphalaria glabrata	NE
Physa acuta	LC
Pisidium sterkianum	NE
Biomphalaria occidentalis	NE
Stenophysa marmorata	NE
Uncancylus concentricus	LC
Eupera klappenbachi	NE
Castalia ambigua	LC
Castalia inflata	NE
Diplodon rhuacoicus	NE
Pomacea patula catemacensi	NE
Drepanotrema cimex	LC
Anodontites elongatus	DD
Anodontites patagonica	NE
Anodontites tenebricosus	NE
Anodontites trapezeus	NE
Diplodon delodontus	NE
Diplodon ellipticus	NE
Popenaias popeii	CR
Pomacea americanista	NE
Pomacea flagellata	NE
Pomacea lineata	LC
Pomacea sp.	NE
Biomphalaria havanensis	LC
Biomphalaria sp.	NE
Chilina dombeiana	NE
Drepanotrema depressissimum	NE
Pseudosuccinea columella	NA
Aylacostoma brunneum	NE
Aylacostoma chloroticum	EW
Heleobia australis	NE
Heleobia bertoniana	NE
Heleobia hatcheri	NE
Heleobia sp	NE
Dreissena bugensis	LC
Dreissena polymorpha	LC
Euglesa compressa	LC
Eupera elliptica	NE
Musculium argentinum	LC
Pisidium dorbignyi	LC
Pisidium punctiferum	NE
Pisidium sp.	NE
Castalia martensi	VU
Diplodon martensi	NE
Diplodon multistriatus	NE
Diplodon parallelopipedon	LC
Diplodon sp	NE
Fossula fossiculifera	NE
Lamproscapha ensiformis	LC
Leila blainvilliana	NE
Monocondylaea corrientesensis	NE
Monocondylaea minuana	NE
Mycetopoda legumen	NE
Mycetopoda siliquosa	NE
Prisodon obliquus	DD
Prisodon syrmatophorus	LC
Quadrula couchiana	CR
Triplodon corrugatus	NE
Cyanocyclas limosa	NE
Corbicula spp	NE
Asolene spixi	NE
Pomacea maculata	NE
Sinotaia quadrata	LC
Tarebia granifera	LC
Anisancylus obliquus	NE
Antillorbis nordestensis	NE
Biomphalaria amazonica	NE
Biomphalaria kuhniana	NE
Chilina parchappii	NE
Drepanotrema lucidum	NE
Gundlachia ticaga	LC
Hebetancylus excentricus	NE
Hebetancylus moricandi	NE
Lymnaea sp.	NE
Aylacostoma guaraniticum	EW
Aylacostoma stigmaticum	EW
Cincinnatia integra	LC
Coahuilix parrasense	NE
Juturnia coahuilae	VU
Mexipyrgus carranzae	DD
Phreatomascogos gregoi	NE
Potamolithus catharinae	NE
Potamolithus ribeirensis	NE
Potamopyrgus antipodarum	LC
Pyrgophoru coronatus	NE
Omalonyx matheroni	NE
Omalonyx sp.	NE
Iphigenia brasiliensis	NE
Congeria spp.	NE
Dreissena rostriformis bugensis	NE
Dreissena spp.	NE
Pachydon hettneri	NE
Rheodresissena spp	NE
Crassostrea rhizophoras	NE
Crassostrea virginica	NE
Eupera cubensis	LC
Eupera platensis	NE
Musculium partumelum	NE
Musculium patagonicum	NE
Musculium sp	NE
Musculium transversum	LC
Pisidium globulus	DD
Pisidium nitidum	LC
Sphaeriidae	NE
Pterotrigonia flava	NE
Actinonaias coyensis	NE
Actinonaias medellina	NE
Actinonaias signata	NE
Anodonta impura	DD
Anodontites cylindracea	NE
Anodontites ferrarisi	NE
Anodontites iheringi	NE
Anodontites laevigatus	NE
Anodontites lucidus	NE
Anodontites obtusus	NE
Anodontites pacha	NE
Anodontites soleniformis	LC
Anodontites sp.	NE
Anodontites trigonus	DD
Callonaia duprei	NE
Castalia psammotica	NE
Castalia quadrata	NE
Castalia stevensi	NE
Cyrtonaias tampicoensis	NE
Diplodon (Rhipidodonta) charruanus	NE
Diplodon (Rhipidodonta) deceptus	NE
Diplodon (Rhipidodonta) koseritzi	NE
Diplodon berthae	NE
Diplodon demeraraensis	NE
Diplodon enno	NE
Diplodon fontaineanus	EN
Diplodon granosus	LC
Diplodon granosus multistriatus	NE
Diplodon hildae	NE
Diplodon parodizi	NE
Diplodon pilsbryi	NE
Diplodon rotundus	NE
Diplodon suavidicus	NE
Diplodon wymaunii	NE
Disconaias disca	NE
Disconaias fimbriata	NE
Friersonia iridella	NE
Fusconaia mitchelli	CR
Megalonaias nickliniana	NE
Monocondylaea pacha	NE
Monocondylaea paraguayana	NE
Mycetopoda soleniformis.	NE
Nephronaias aztecorum	NE
Popenaias berezai	NE
Popenaias semirasa	NE
Potamilus metnecktayi	NE
Psoronaias semigranosa	NE
Rhipidodonta burroughiana	NE
Rhipidodonta charruana	NE
Rhipidodonta garbei	NE
Rhipidodonta hylaea	DD
Rhipidodonta paranensis	NE
Rhipidodonta variabilis	NE
Truncilla cognata	NE
Utterbackia imbecillis	LC
Corbicula fluminalis	LC
Asolene platae	NE
Marisa sp.	NE
Pomacea haustrum	NE
Pomacea megastoma	LC
Balconorbis sabinasensis	NE
Balconorbis uvaldensis	NE
Melanoides spp.	NE
Neritina virginea	LC
Vitta usnea	NE
Biomphalaria helophila	LC
Biomphalaria oligoza	NE
Biomphalaria orbignyi	NE
Biomphalaria pallida	NE
Biomphalaria schrammi	LC
Biomphalaria tenagophila tenagophila	NE
Burnupia ingae	NE
Chilina gibbosa	NE
Chilina luciae	NE
Chilina mendozana	NE
Chilina nicolasi	NE
Chilina ovalis	NE
Chilina santiagoi	NE
Drepanotrema heloicum	NE
Drepanotrema kermatoides	NE
Drepanotrema schubarti	NE
Drepanotrema spp.	NE
Ferrissia californica	LC
Galba sp.	NE
Gyraulus parvus	LC
Helisoma anceps	LC
Lymnaea viator	NE
Mayabina polita	NE
Menetus dilatatus	LC
Mexinauta impluviatus	DD
Planorbella dury	NA
Planorbella scalaris	LC
Planorbella trivolvis	LC
Stenophysa spiculata	NE
Aphaostracon theiocrenetum	NE
Aroapyrgus clenchi	NE
Assiminea cienegensis	NE
Coahuilix cf. Landyei	NE
Coahuilix hubbsi	CR
Cochliopina riograndensis	NE
Eremopyrgus elegans	NE
Heleobia aff. parchappii	NE
Heleobia conexa	NE
Heleobia piscium	NE
Idiopyrgus sp.	NE
Littoridinops tenuipes	NE
Littorina angulifera	NE
Lyogyrus sp.	NE
Mexipyrgus viescaensis	NE
Mexithauma quadripaludium	NE
Potamolithus aff. Buschi	NE
Potamolithus grossus	NE
Potamolithus nelidae	NE
Potamolithus nezibrus	NE
Potamolithus rauli	NE
Potamolithus recurvatus	NE
Potamolithus spp.	NE
Potamolithus tricarinatus	NE
Probythinella protera	NE
Pyrgophorus parvulus	LC
Pyrgophorus platyrachis	NE
Pyrgulopsis manantiali	NE
Pyrgulopsis minckleyi	NE
Pyrgulopsis paleoacarinatus	NE
Pyrgulopsis paleominckleyi	NE
Teinostoma brankovitsi	NE
Tryonia porrecta	LC
Phrontis vibex	NE
Omalonyx convexus	NE
Succinea meridionalis	NE
Succinea puna	NE
Physa cubensis	NE
Physa marmorata	LC
Physella acuta	NE

## Sheet: S6
Supplementary Material S6. Network metrics of the author collaboration network in freshwater mollusk research based on Web of Science records.
Node	Cluster	Betweenness	Closeness	PageRank		The analysis was performed on a collection downloaded from the following bibliographic database WOS. This graph was generated with the following parameters: normalize: association; Title: Author Collaboration network; type: auto; label: TRUE; labelsize: 2; label.cex: TRUE; label.color: FALSE; label.n: 20; halo: FALSE; cluster: walktrap; community.repulsion: 0.05; size: 5; size.cex: TRUE; curved: …
darrigran g	1	0	0.053	0.05
collado ga	1	0.667	0.059	0.044
dos santos sb	1	8	0.059	0.056
mansur mcd	1	0	0.04	0.032
gregoric deg	1	20.667	0.077	0.068
de lucía m	1	0.667	0.059	0.064
etchegoin ja	2	0	1	0.056
merlo mj	2	0	1	0.056
boltovskoy d	3	0	0.5	0.062
cataldo d	3	0	0.5	0.052
sylvester f	3	0	0.5	0.052
czaja a	4	0	0.5	0.057
estrada-rodríguez jl	4	0	0.5	0.057
romero-méndez u	4	0	0.5	0.052
rumi a	5	18	0.067	0.063
vogler re	5	0	0.048	0.064
beltramino aa	5	0	0.048	0.061
peso jg	5	0	0.048	0.053

## Sheet: S7
Supplementary Material S7. Most productive authors in freshwater mollusk research and gender distribution of authorship in Latin America and the Caribbean.
Author	Number publication
Demetrio	47	Men	9	69.2308
Cataldo	31	Woman	4	30.7692
Sylvester	23		13	100
Czaja	16
Rumi	16
Darrigan	14
Estrada-Rodriguez	14
Peso	13
Vogler	13
Beltramino	12
Mansur	12
Correa	11
Romero-Mendez	11
	233
